# Supplementary material
Source: PubMed Central journal article supplement (PMC2879742)
Supplement: tpc.110.073866_1.pdf [file tpc.110.073866_1.pdf]

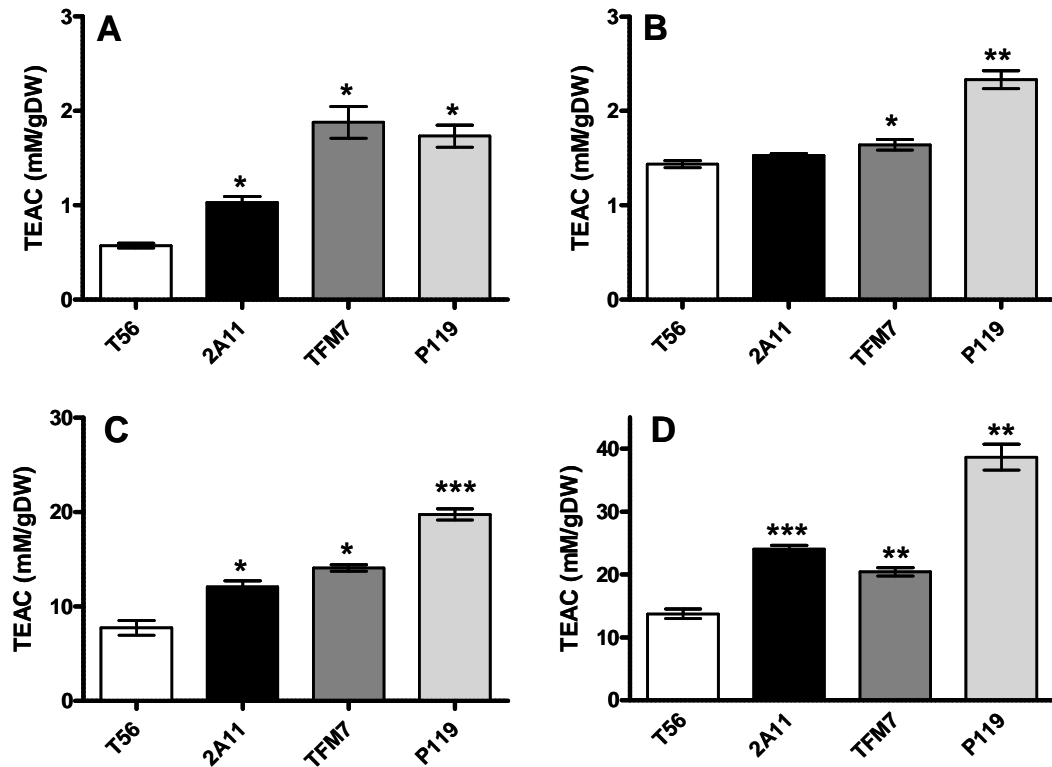

**Supplemental Figure 1. Determination of both lipophilic (A and B) and hydrophilic (C and D) antioxidant activity in both mature green (A and C) and ripe fruit (B and D).** TEAC assays were performed as described in the methods section with data represented as mean  $\pm$  SD. Measurements were made on three biological and three technical replicates. The biological replicates were three plants (three fruit being pooled per plant). Aqueous methanol (80% v/v) and chloroform extracts were used for the determination of hydrophilic and lipophilic antioxidants respectively. Student *t*-tests were used to determine significant differences, between pairwise comparison between the wild type and the transgenic varieties.  $P < 0.05$ ,  $P < 0.01$ ,  $P < 0.001$  are indicated by \*, \*\*, \*\*\* respectively.

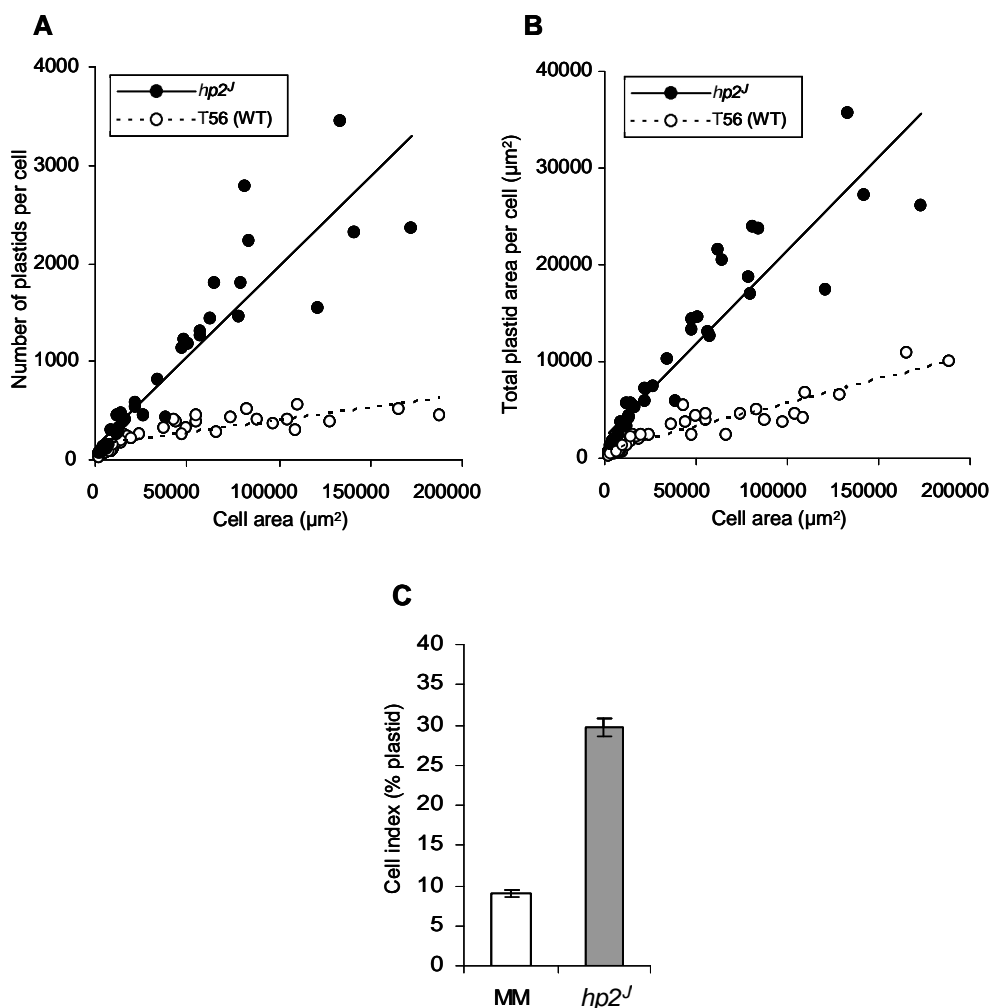

**Supplemental Figure 2. Altered plastid parameters resulting from the  $hp2^J$  mutant allele.**

The cellular plastid compartment in the  $hp2^J$  mutant has been compared to its Moneymaker (MM) background. Individual cells were examined microscopically and their plan area, number of chloroplasts and size of a chloroplast sample (20 per cell) quantified. **(A)** shows the number of plastids represented as a function of the cells plan area (the plan area being the area of the cells projection onto one plan). Twenty cells were used in the measurements. **(B)** represents the total area of plastid per cell. These data were obtained from twenty individual cells, counting the total number of plastids per cell and the average area of twenty plastids in one randomly selected region, these values were then plotted as a function of the cells plan area (the plan area being the area of the cells projection onto one plan). **(C)** shows the average cell index (ratio of total plastid area to cell plan area, expressed as a percentage), again the cell plan area is the area of the cells projection onto one plan. The data in **(C)** is represented as the mean  $\pm$  SD.

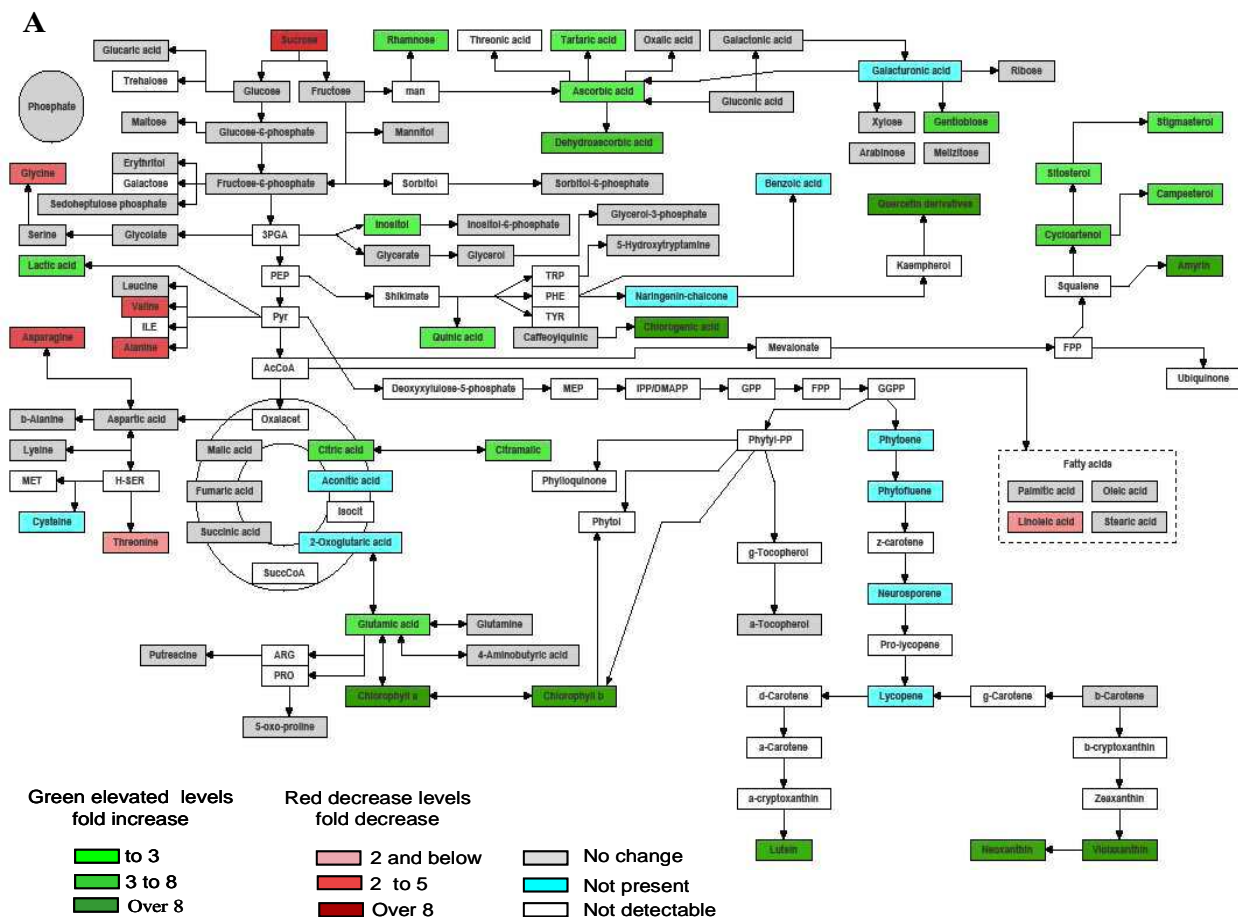

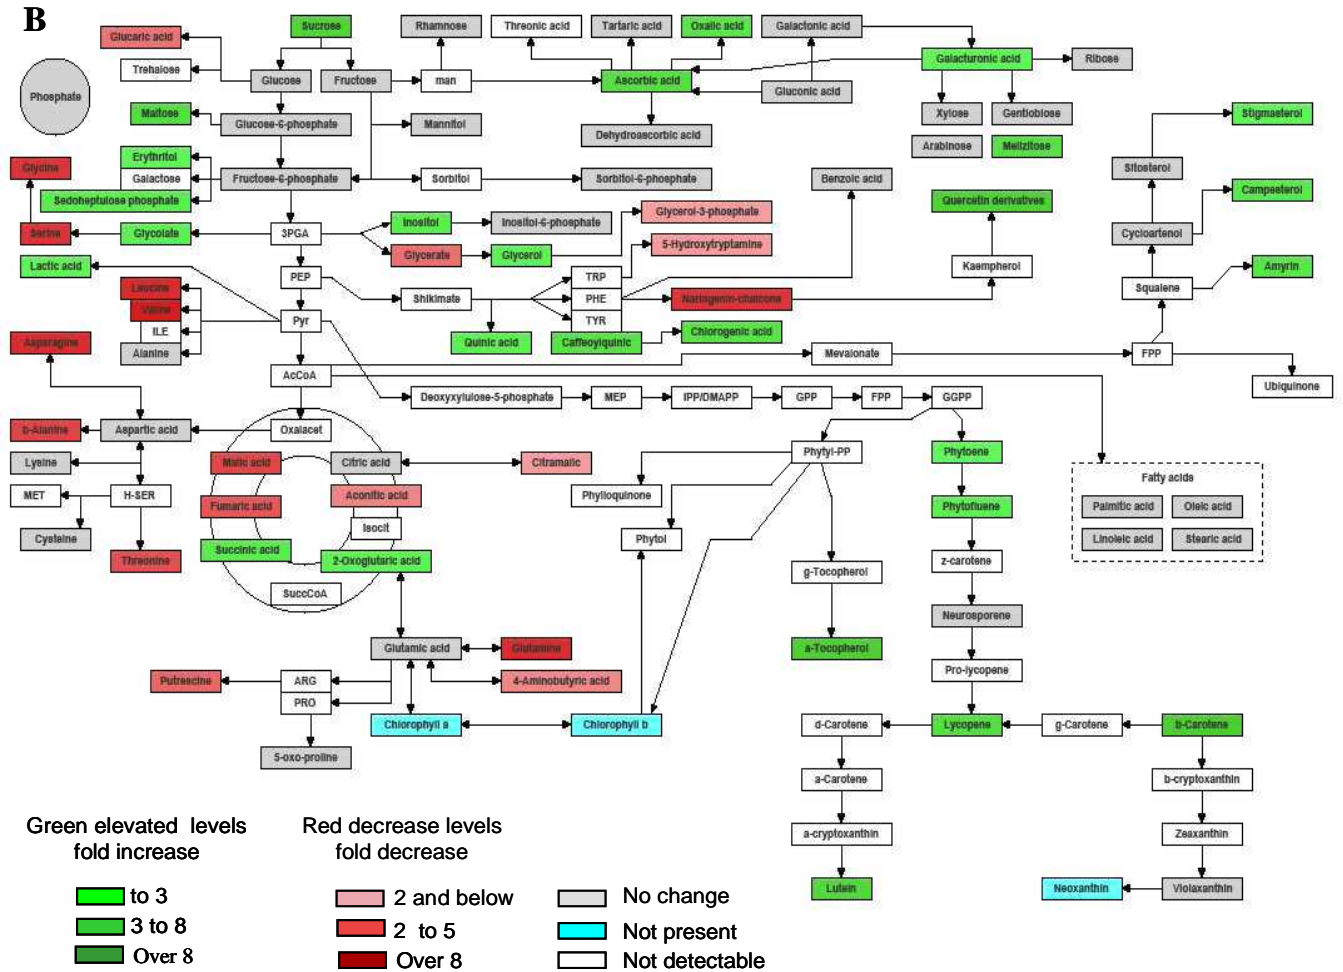

**Supplemental Figure 3 A and B. Changes in metabolites occurring in mature green (A) and ripe (B) fruit as a result of *DET1* down-regulation under the control of the TFM7 promoter.**

The metabolomic data has been displayed quantitatively over schematic representations of biochemical pathways produced with BioSynLab software ([www.biosynlab.com](http://www.biosynlab.com)). A false colour scale has been used to display the quantity of each metabolite. Green indicates an increase in the metabolite has occurred compared to the control (T56). Pale Green indicates a significant three-fold increase; a three-fold to eight-fold increase is green, and more than eight-fold is dark green. Grey indicates no significant change, while blue indicates that the metabolite was not detected in the samples. White indicates that the compound cannot be detected using the analytical platforms available. Red coloration has been used to represent decreased metabolite levels; dark red is below eight-fold, red is below two-fold to five-fold, and pale red is below twofold. Abbreviations are as follows; Aco, aconitic acid; L-Asc, ascorbic acid; citramal, citramalic acid; Cit, citric acid; dehydroasc, dehydroascorbic acid; Fum, fumaric acid; Mal, malic acid; 2-oxoglut, 2-oxoglutaric acid; Succ, succinic acid; Thre, threonic acid; 5HT, 5-hydroxytryptamine; 5-OxoPRO, 5-oxo-proline; Arab, arabinose; DXP, 1-deoxy-D-xylulose-5-phosphate; F6P, fructose-6-phosphate; G6P, glucose-6-phosphate; 3-CaQuinic, 3-caffeoylquinic acid; CGA, chlorogenic acid; FPP, farnesyl diphosphate; GPP, geranyl diphosphate.

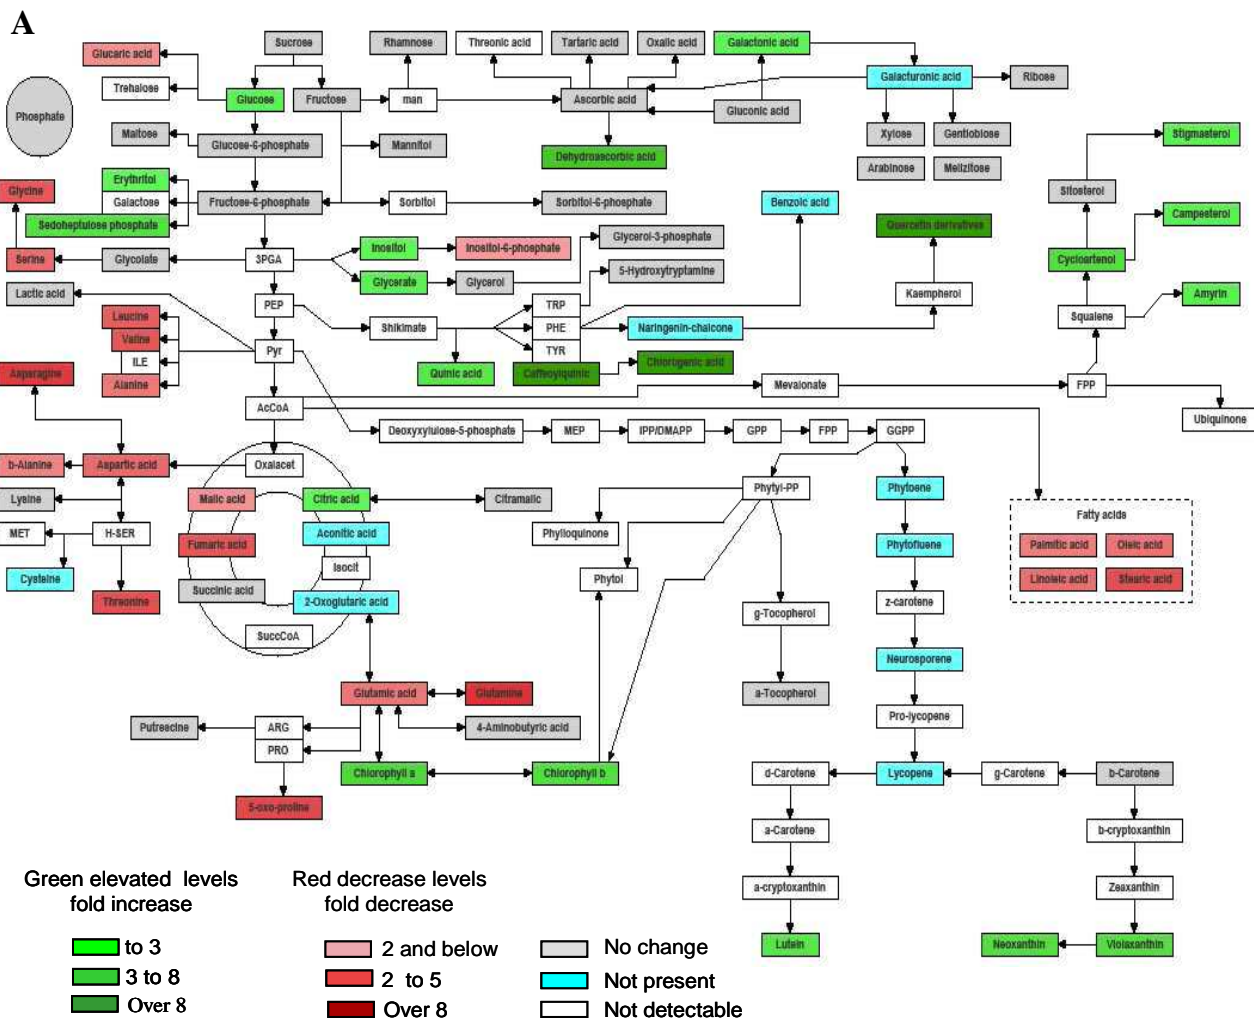

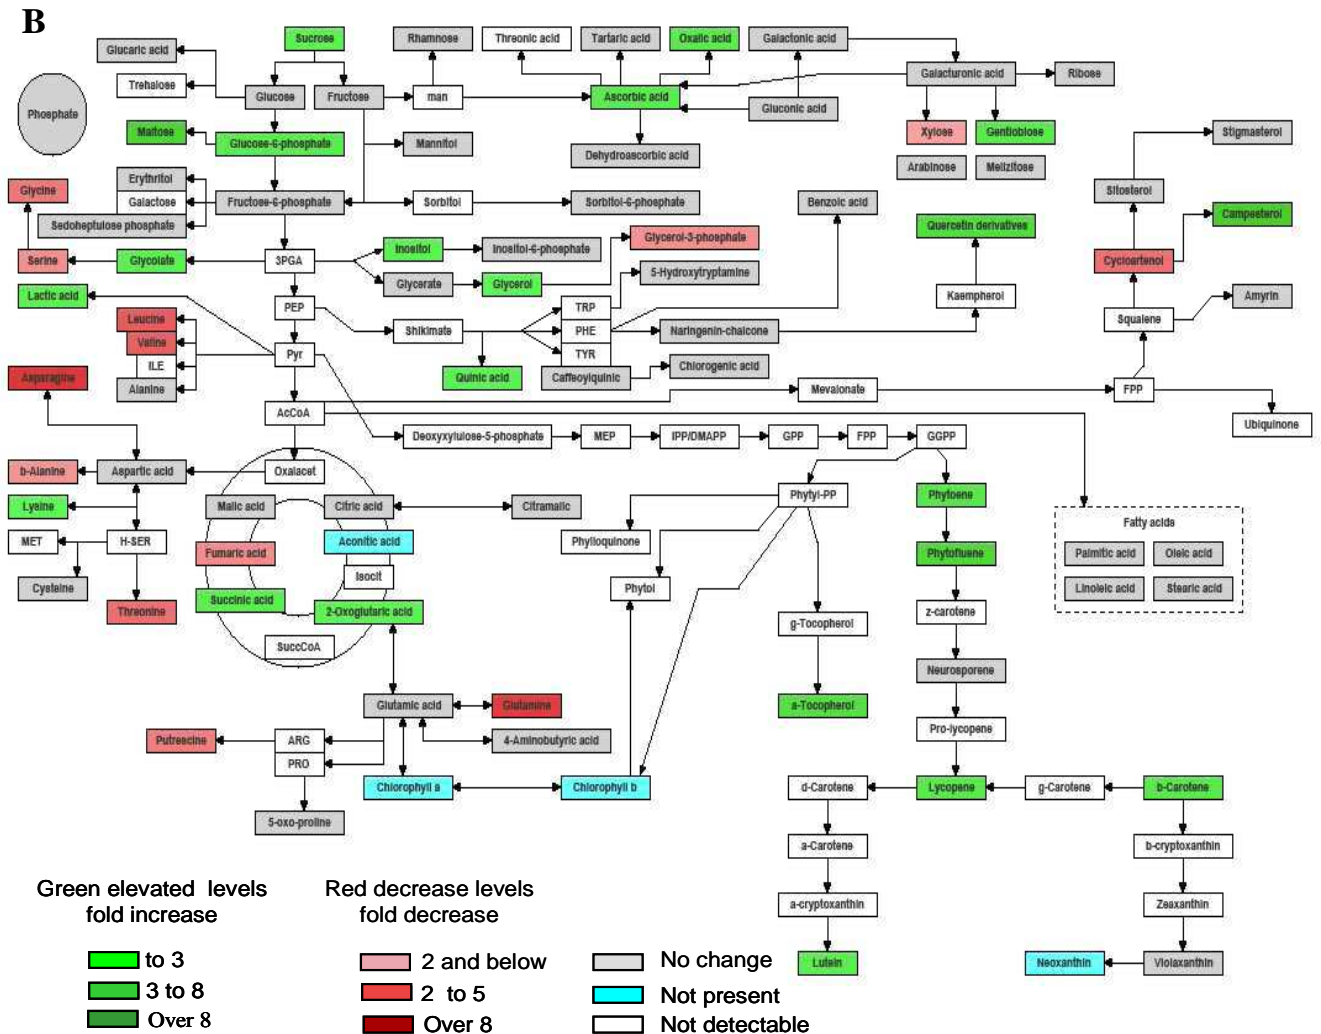

**Supplemental Figure 4 A and B. Changes in metabolites occurring in mature green (A) and ripe (B) fruit as a result of *DET1* down-regulation under the control of the 2A11 promoter.**

The metabolomic data has been displayed quantitatively over schematic representations of biochemical pathways produced with BioSynLab software ([www.biosynlab.com](http://www.biosynlab.com)). A false colour scale has been used to display the quantity of each metabolite. Green indicates an increase in the metabolite has occurred compared to the control (T56). Pale Green indicates a significant three-fold increase in pale green, a three-fold to eight-fold increase is green, and more than eight-fold is dark green. Grey indicates no significant change, while blue indicates that the metabolite was not detected in the samples. White indicates that the compound cannot be detected using the analytical platforms available. Red coloration has been used to represent decreased metabolite levels; dark red is below eight-fold, red is below two-fold to five-fold, and pale red is below two-fold. Abbreviations are as follows; Aco, aconitic acid; L-Asc, ascorbic acid; citramal, citramalic acid; Cit, citric acid; dehydroasc, dehydroascorbic acid; Fum, fumaric acid; Mal, malic acid; 2-oxoglut, 2-oxoglutaric acid; Succ, succinic acid; Thre, threonic acid; 5HT, 5-hydroxytryptamine; 5-OxoPRO, 5-oxo-proline; Arab, arabinose; DXP, 1-deoxy-D-xylulose-5-phosphate; F6P, fructose-6-phosphate; G6P, glucose-6-phosphate; 3-CaQuinic, 3-caffeoylquinic acid; CGA, chlorogenic acid; FPP, farnesyl diphosphate; GPP, geranyl diphosphate.



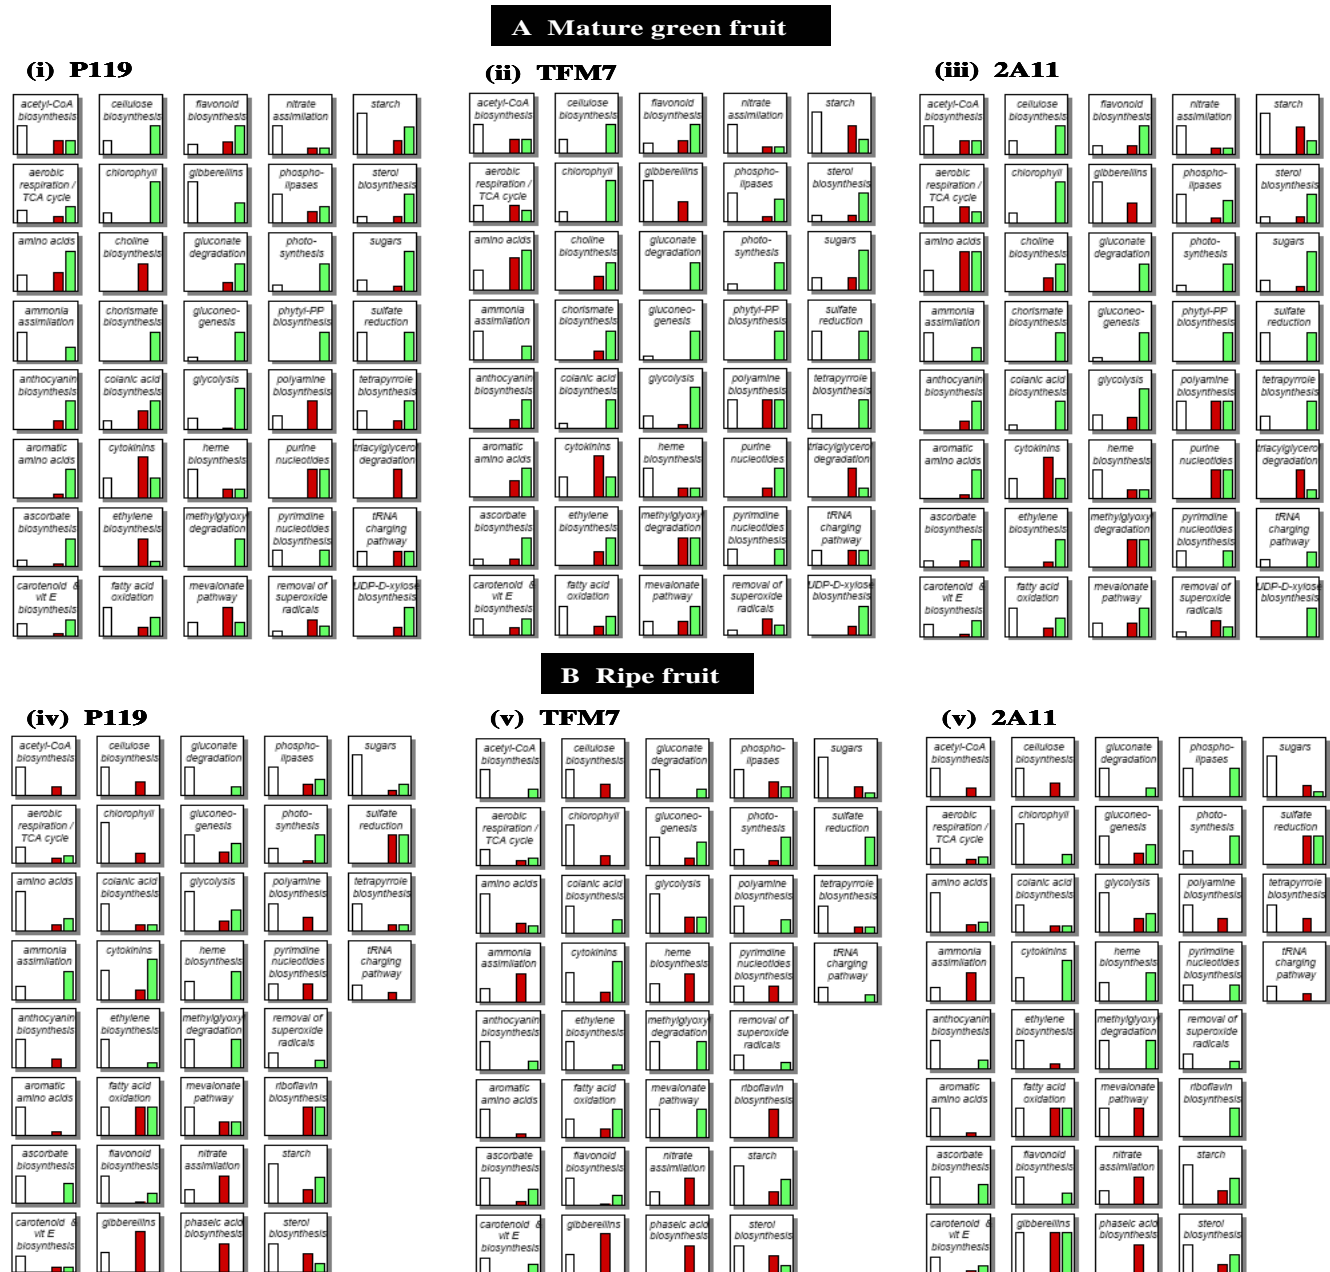

**Supplemental Figure 6. Overview of relative changes in gene expression occurring at (A) the mature green and (B) ripe stages of fruit development and ripening, in the P119 (i) and (iv), TFM7 (ii) and (v) and 2A11 (iii) and (vi), varieties respectively.**

Transcripts have been classified on the basis of function. Changes in gene expression are relative to levels determined in control (T56) samples. For each given functional classification those bars coloured green represent the proportion of transcripts that are up-regulated, the red coloured bars indicate down-regulation and the white coloured bar indicates no change. For accurate comparison those transcripts present in all varieties have been used. The parameters used to functionally classify the transcripts and statistical methods used to determine significance are detailed in the methods section. Supplemental Dataset 1 details individual genes classified within each functional category, their changes in expression levels and significance.



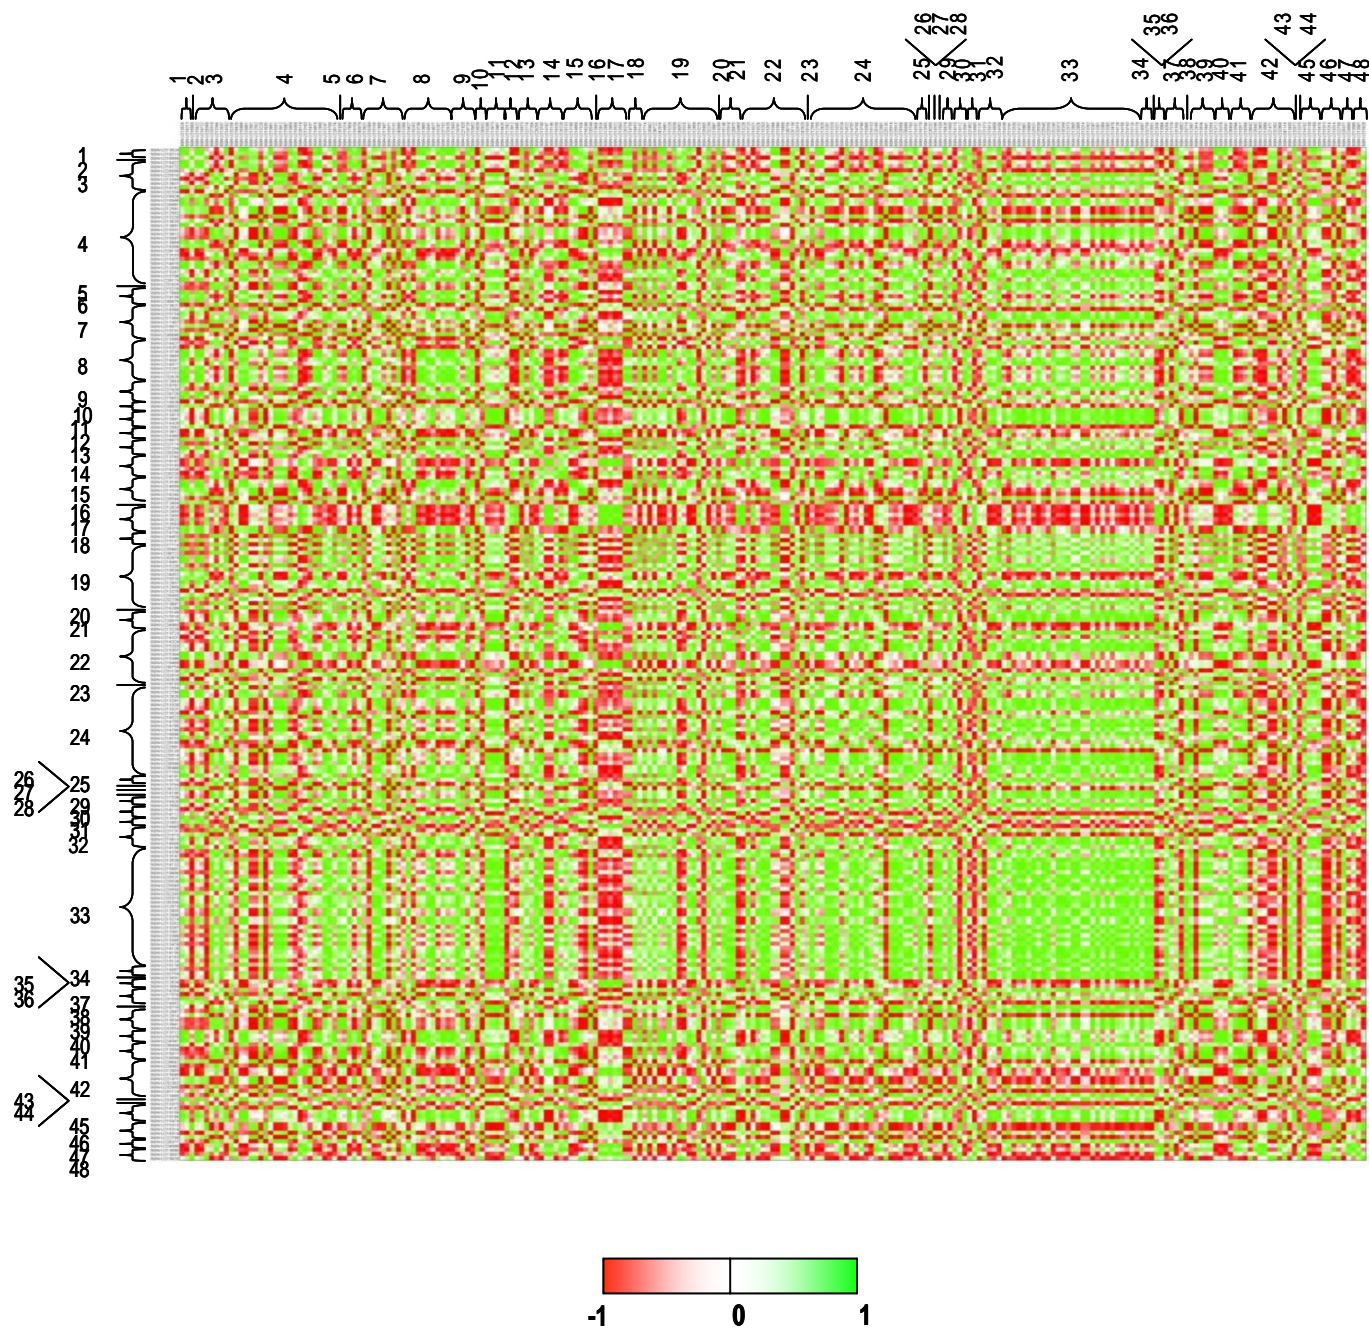

**Supplemental Figure 7. . Heatmap illustrating the changes occurring in gene to gene correlations resulting from *DET1* down-regulation at the mature green stage of fruit development.**

Data was generated from microarray experiments performed on all three *DET1* varieties compared to their respective wild type controls. Only gene transcripts present in all varieties were used in these analyses (~ 250 genes). Pearson correlation coefficients ( $r$ ) were calculated using datasets for all the *DET1* genotypes, with triplicate biological replication per genotype, calculations were carried out using BioSynLab software ([www.Biosynlab.com](http://www.Biosynlab.com)). The degree of correlation is provided in a false colour scale. Each cell has an  $r$ -value as indicated in the scale insert provided. A significance of  $P < 0.05$  was used for  $r$  value. Positive correlations are represented by green and negative red coloration. The transcripts have been categorised functionally into pathways and processes and labeled numerically along the axes as follows; 1: acetyl-CoA biosynthesis, 2: acyl-ACP thioesterase pathway, 3: aerobic respiration/TCA cycle, 4: amino acids, 5: ammonia assimilation cycle, 6: anthocyanin biosynthesis, 7: aromatic amino acids, 8: ascorbate biosynthesis, 9: carotenoid biosynthesis, 10: cellulose biosynthesis, 11: chlorophyll, 12: choline biosynthesis, 13: chorismate biosynthesis, 14: colanic acid biosynthesis, 15: cytokinins, 16: epicuticular wax biosynthesis, 17: ethylene biosynthesis, 18: fatty acid oxidation, 19: phenylpropanoid biosynthesis, 20: gibberellins, 21: gluconate degradation, 22: gluconeogenesis, 23: glutathione biosynthesis, 24: glycolysis, 25: heme biosynthesis, 26: homogalacturonan degradation, 27: IAA biosynthesis, 28: methylerythritol phosphate pathway, 29: methylglyoxal degradation, 30: mevalonate pathway, 31: nitrate assimilation pathway, 32: phospholipases, 33: photosynthesis, 34: phytl-PP biosynthesis, 35: plastoquinone biosynthesis, 36: polyamine biosynthesis, 37: purine nucleotides, 38: pyrimidine deoxyribonucleotides, 39: removal of superoxide radicals, 40: starch, 41: sterol biosynthesis, 42: sugars, 43: sulphate reduction, 44: tetrahydrofolate biosynthesis, 45: tetrapyrrole biosynthesis, 46: triacylglycerol degradation, 47: tRNA charging pathway, 48: UDP-D-xylose biosynthesis.

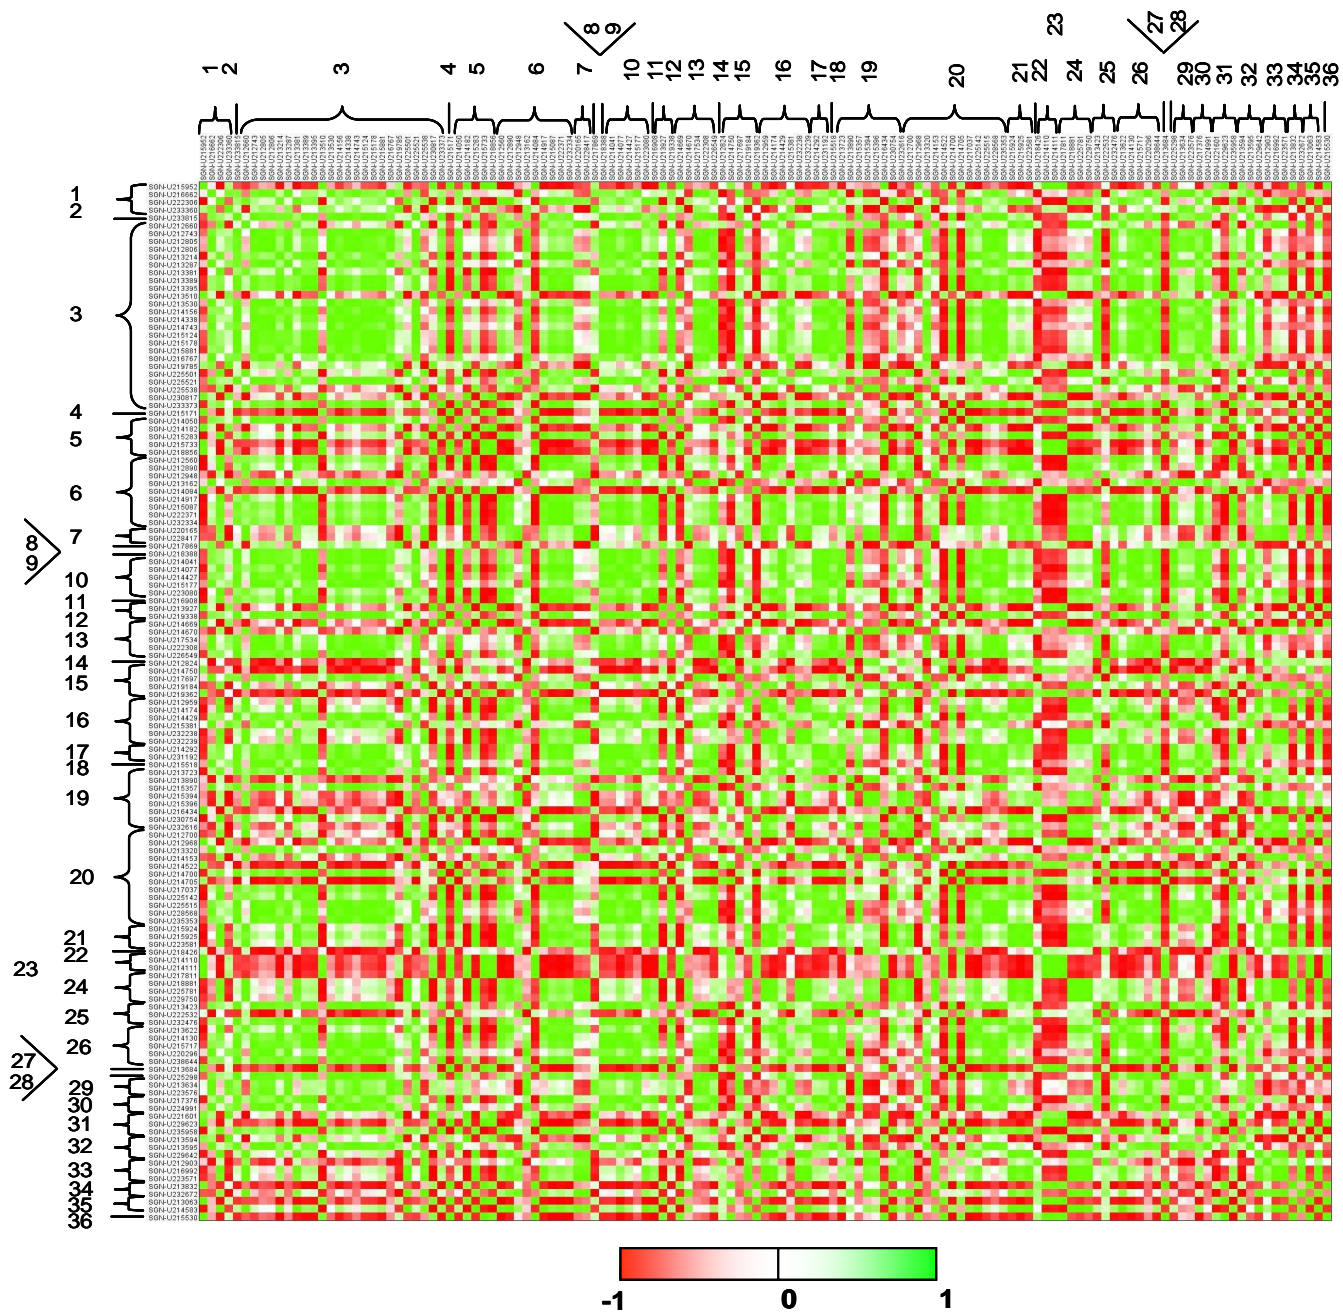

**Supplemental Figure 8. Heatmap illustrating the changes occurring in gene to gene correlations resulting from *DET-1* down-regulation at the stage of ripe fruit.**

The data processing performed is detailed in the Methods section. Only gene transcripts present in all varieties were used in these analyses (~ 150 genes). Pearson correlation coefficients ( $r$ ) were calculated using datasets for all the *DET1* genotypes, with triplicate biological replication per genotype, calculations were carried out using BioSynLab software ([www.Biosynlab.com](http://www.Biosynlab.com)). The degree of correlation is provided in a false colour scale. Each cell has an  $r$ -value as indicated in the scale insert provided. A significance of  $P < 0.05$  was used for  $r$  value. Positive correlations are represented by green and negative by red coloration. The transcripts have been categorised functionally into pathways and processes and labeled numerically along the axes as follows; 1: carotenoid/Vitamin E biosynthesis, 2: Chlorophyll, 3: photosynthesis, 4: acetyl-CoA biosynthesis, 5: aerobic respiration/TCA cycle, 6: amino acids, 7: ammonia assimilation cycle, 8: anthocyanin biosynthesis, 9: aromatic amino acids, 10: ascorbate biosynthesis, 11: cellulose biosynthesis, 12: colanic acid biosynthesis, 13: cytokinins, 14: ethylene biosynthesis, 15: fatty acid oxidation, 16: phenylpropanoid biosynthesis, 17: gibberellins, 18: gluconate degradation, 19: gluconeogenesis, 20: glycolysis, 21: heme biosynthesis, 22: methylglyoxal degradation, 23: mevalonate pathway, 24: nitrate assimilation pathway, 25: phaseic acid biosynthesis, 26: phospholipases, 27: polyamine biosynthesis, 28: pyrimidine deoxyribonucleotides, 29: removal of superoxide radicals, 30: riboflavin biosynthesis, 31: starch, 32: sterol biosynthesis, 33: sugars, 34: sulphate reduction, 35: tetrapyrrole biosynthesis, 36: tRNA charging pathway.

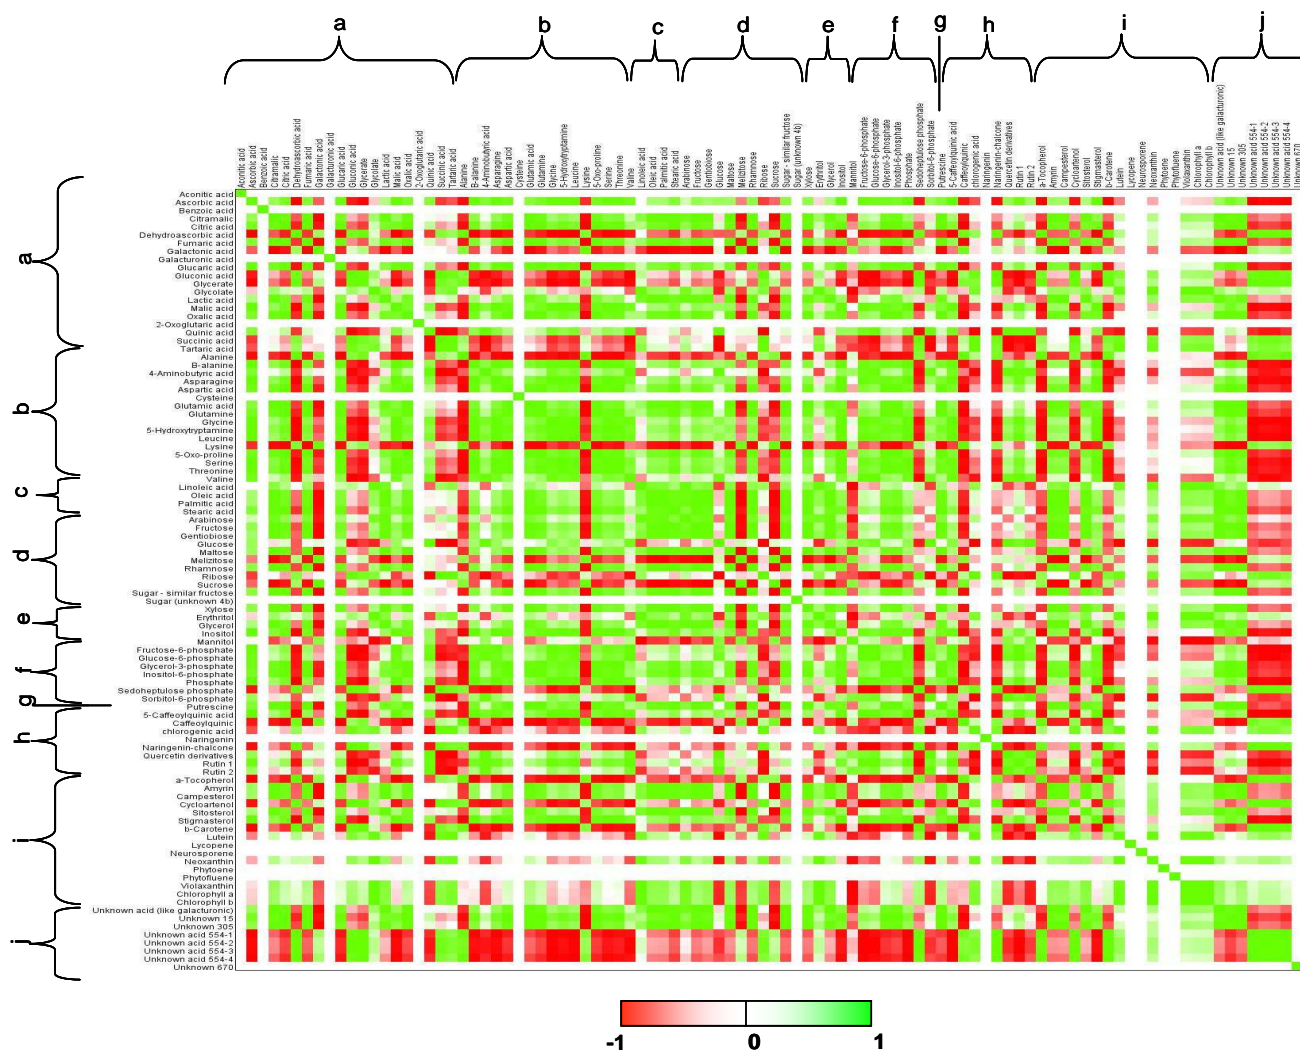

**Supplemental Figure 9. Heatmap showing the changes occurring in metabolite to metabolite correlations resulting from *DET1* down-regulation at the mature green stage of fruit development.**

Data was generated using various metabolite profiling platforms as detailed in the Methods section. Analyses were performed on all three *DET-1* varieties compared to their respective wild type controls. The data processing performed is detailed in the Methods section. Only metabolites present in all varieties were used in these analyses (~ 100 metabolites know and unknown). Pearson correlation coefficients ( $r$ ) were calculated using datasets for all the *DET1* genotypes, with triplicate biological replication per genotype, calculations were carried out using BioSynLab software ([www.Biosynlab.com](http://www.Biosynlab.com)). The degree of correlation is provided in a false colour scale. Each cell has an  $r$ -value as indicated in the scale insert provided. A significance of  $P < 0.05$  was used for  $r$  value. Positive correlations are represented by green and negative by red coloration. The metabolites have been grouped into chemical classes and labeled accordingly along the axes as follows; a: organic acids, b: amino acids, c: fatty acids, d: sugars, e: polyols, f: phosphates, g: N-containing compounds, h: phenylpropanoids/flavonoids, i: terpenoids and j: known and unknowns.

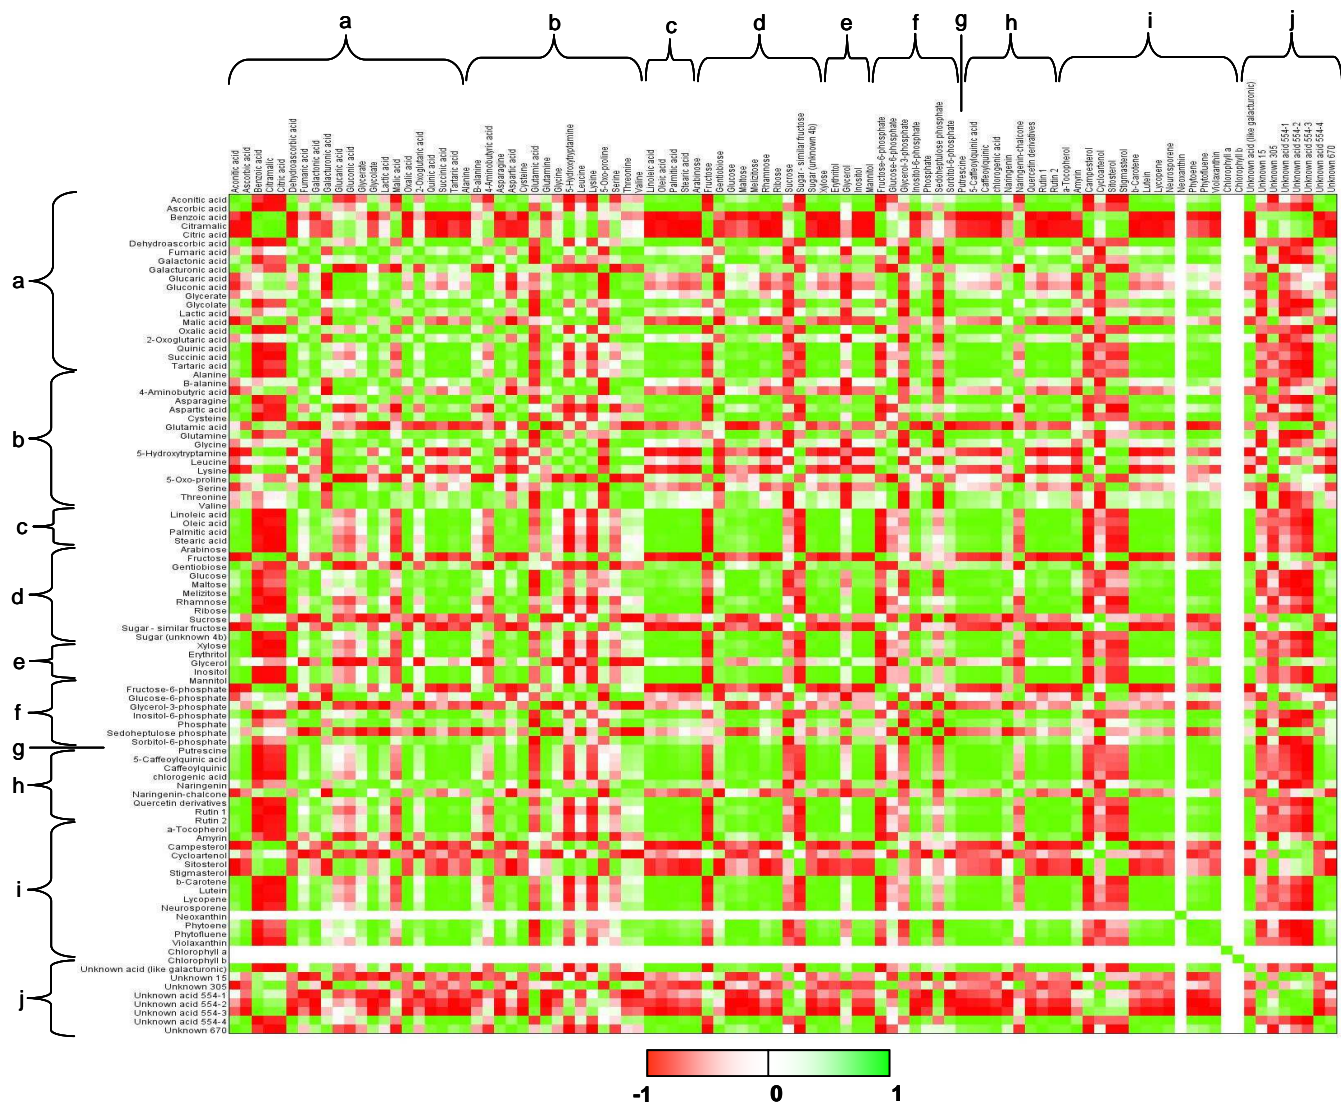

**Supplemental Figure 10. Heatmap showing the changes occurring in metabolite to metabolite correlations resulting from *DET1* down-regulation at ripe stage of fruit development.**

Data was generated from various metabolite profiling platforms as detailed in the Methods section. Analyses were performed on all three *DET-1* varieties compared to their respective wild type controls. The data processing performed is detailed in the Methods section. Only metabolites present in all varieties were used in these analyses (~ 100 metabolites known and unknown). Pearson correlation coefficients ( $r$ ) were calculated using datasets for all the *DET1* genotypes, with triplicate biological replication per genotype, calculations were carried out using BioSynLab software ([www.Biosynlab.com](http://www.Biosynlab.com)). The degree of correlation is provided in a false colour scale. Each cell has an  $r$ -value as indicated in the scale insert provided. A significance of  $P < 0.05$  was used for  $r$  value. Positive correlations are represented by green and negative by red coloration. The metabolites have been grouped into chemical classes and labeled accordingly along the axes as follows; a: organic acids, b: amino acids, c: fatty acids, d: sugars, e: polyols, f: phosphates, g: N-containing compounds, h: phenylpropanoids/flavonoids, i: terpenoids and j: known and unknowns.

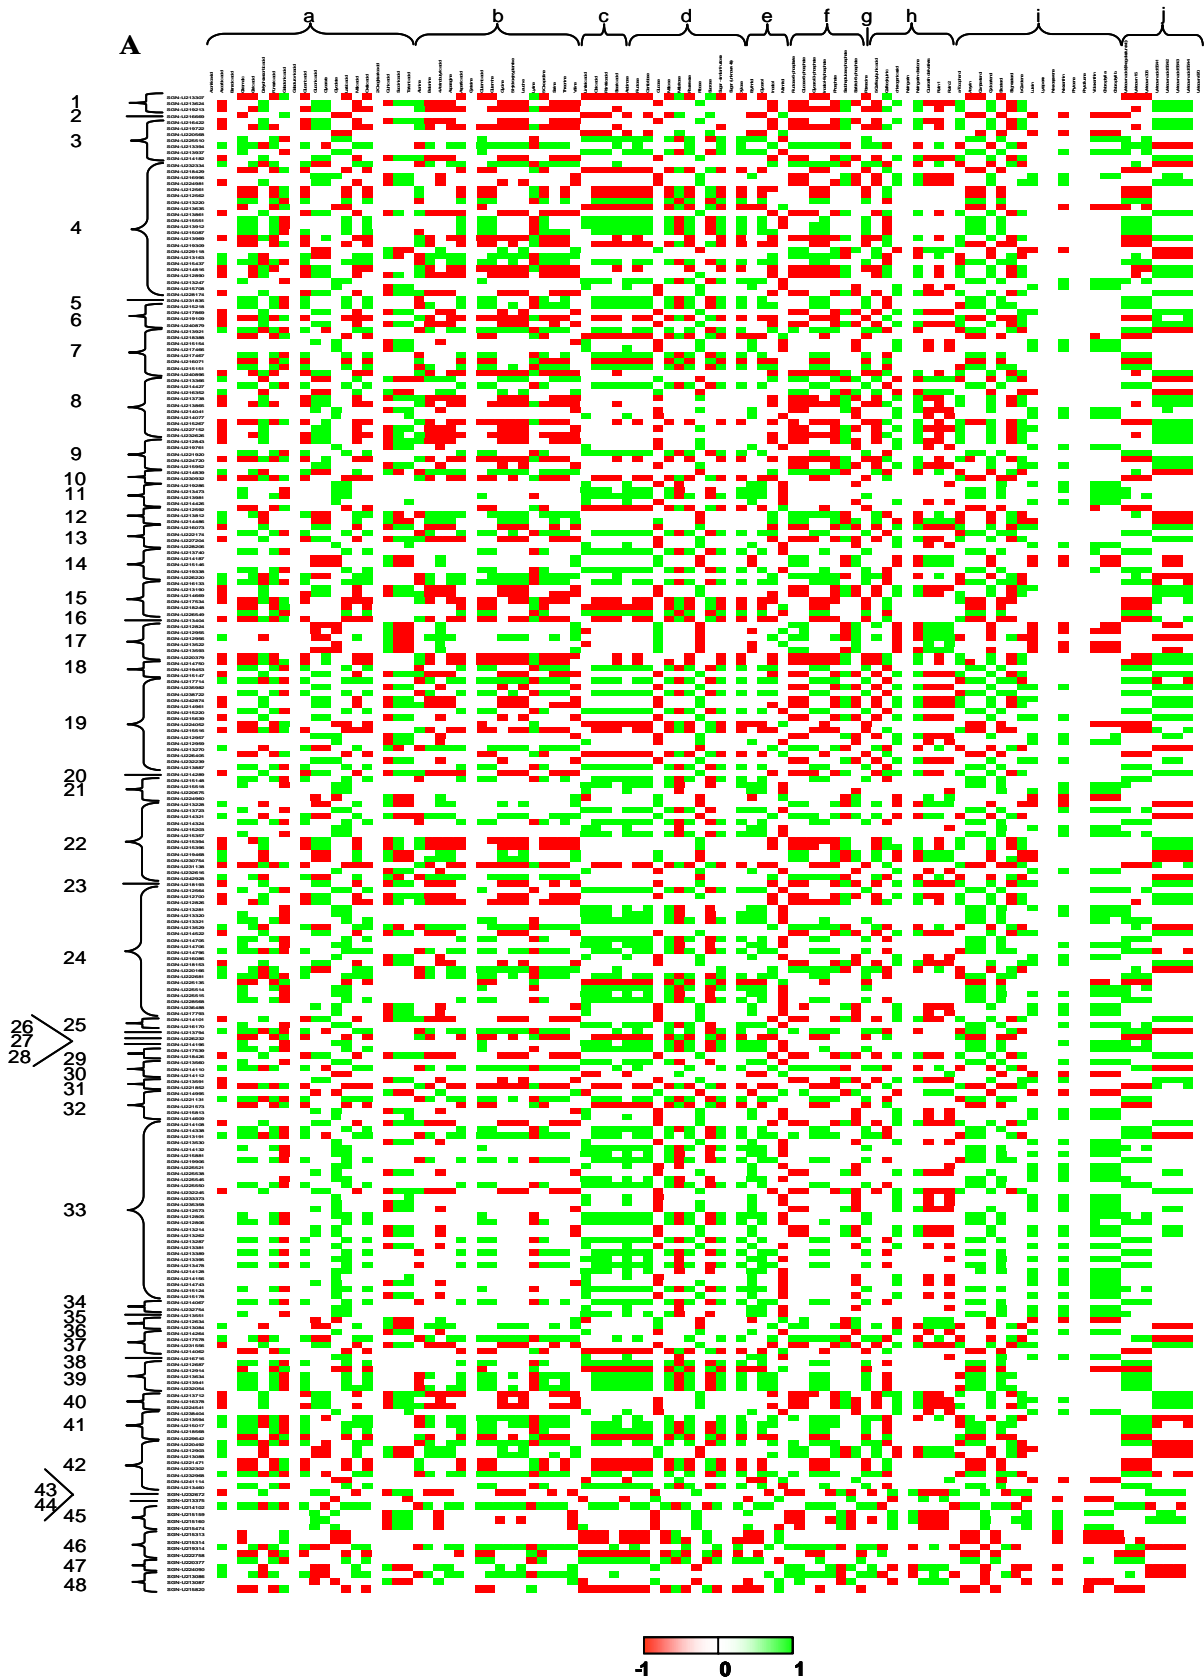





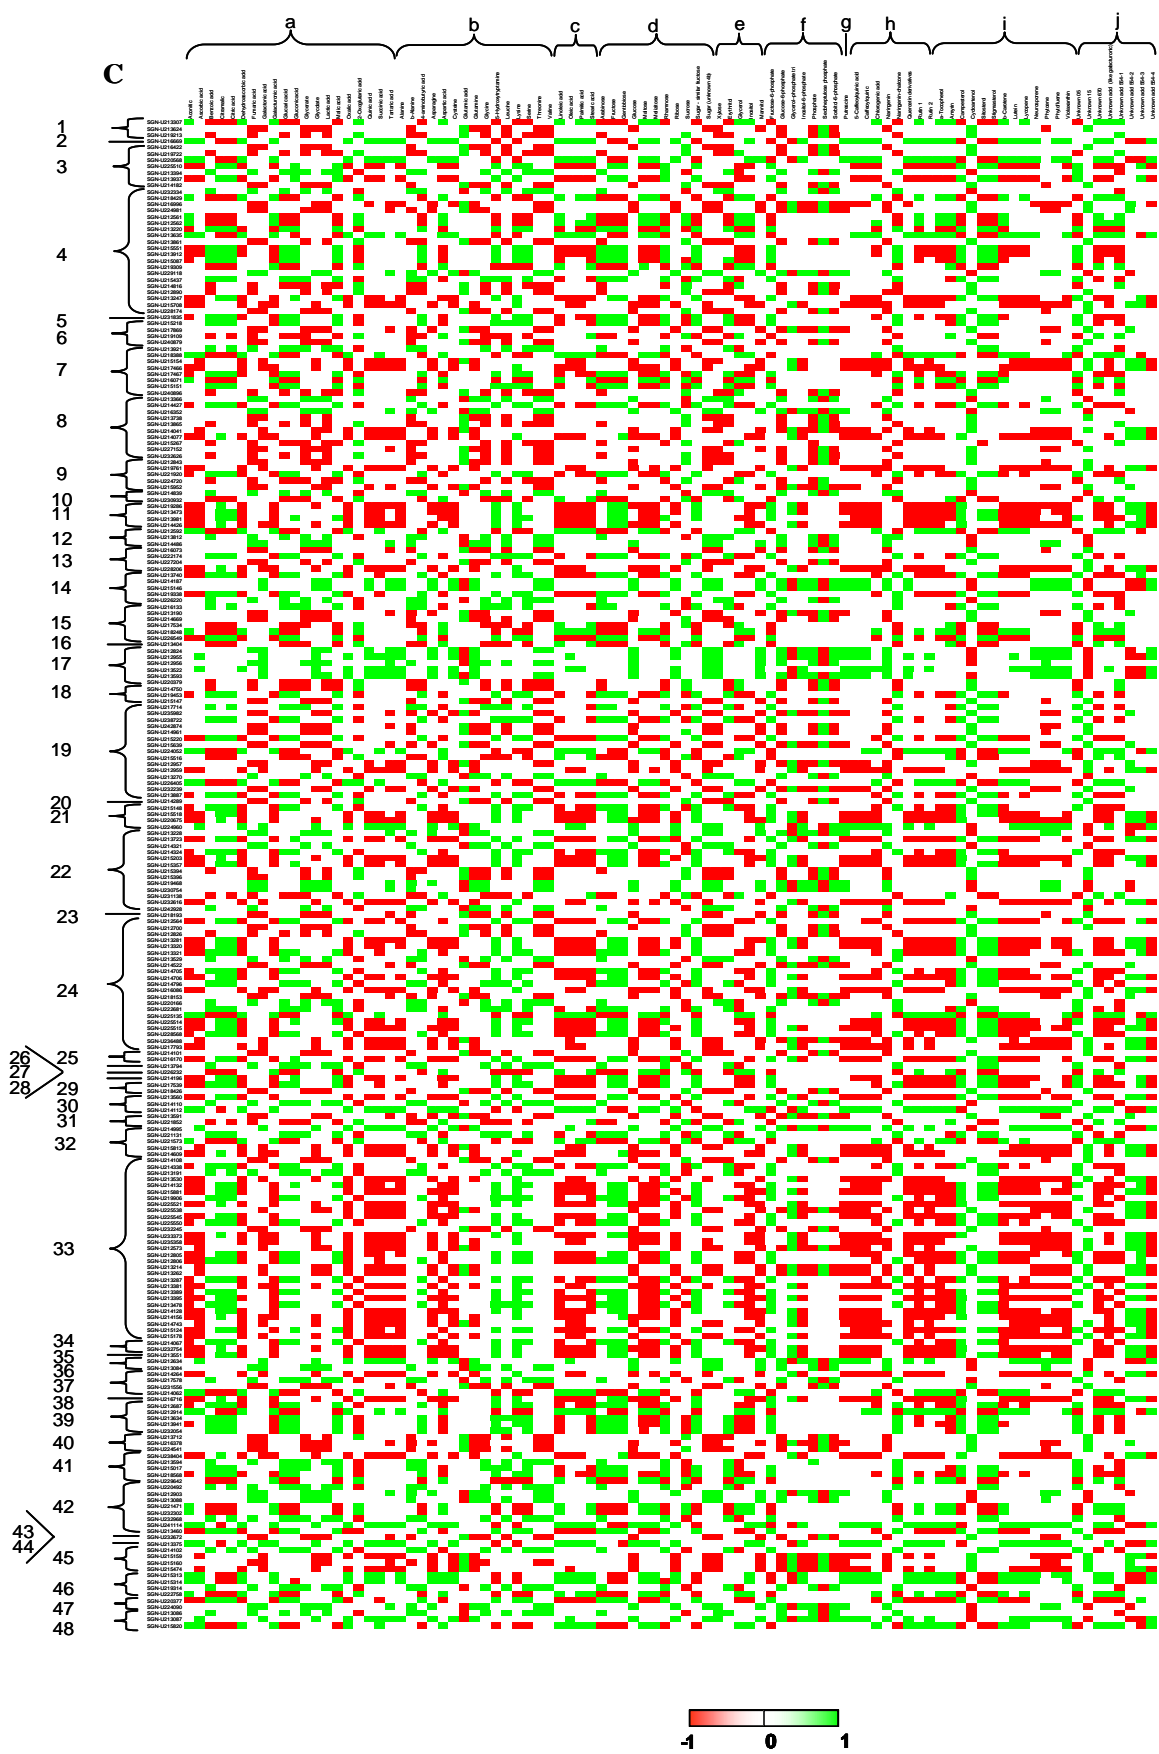

**Supplemental Figure 11. Heatmap displaying gene transcript and metabolite correlations associated with the relative changes resulting from *DET1* down-regulation compared to the wild type (T56) control at the mature green fruit developmental stage (A), ripe fruit (B) and mature green transcripts to ripe metabolites (C).**

Data was generated from microarray and metabolomic analysis of all three varieties (P119, TFM7 and 2A11). In Panel (A), transcripts have been grouped by function and numbered using the following key; 1: acetyl-CoA biosynthesis, 2: acyl-ACP thioesterase pathway, 3: aerobic respiration/TCA cycle, 4: amino acids, 5: ammonia assimilation cycle, 6: anthocyanin biosynthesis, 7: aromatic amino acids, 8: ascorbate biosynthesis, 9: carotenoid biosynthesis, 10: cellulose biosynthesis, 11: chlorophyll, 12: choline biosynthesis, 13: chorismate biosynthesis, 14: colanic acid biosynthesis, 15: cytokinins, 16: epicuticular wax biosynthesis, 17: ethylene biosynthesis, 18: fatty acid oxidation, 19: phenylpropanoid biosynthesis, 20: gibberellins, 21: gluconate degradation, 22: gluconeogenesis, 23: glutathione biosynthesis, 24: glycolysis, 25: heme biosynthesis, 26: homogalacturonan degradation, 27: IAA biosynthesis, 28: methylerythritol phosphate pathway, 29: methylglyoxal degradation, 30: mevalonate pathway, 31: nitrate assimilation pathway, 32: phospholipases, 33: photosynthesis, 34: phytl-PP biosynthesis, 35: plastoquinone biosynthesis, 36: polyamine biosynthesis, 37: purine nucleotides, 38: pyrimidine deoxyribonucleotides, 39: removal of superoxide radicals, 40: starch, 41: sterol biosynthesis, 42: sugars, 43: sulphate reduction, 44: tetrahydrofolate biosynthesis, 45: tetrapyrrole biosynthesis, 46: triacylglycerol degradation, 47: tRNA charging pathway, 48: UDP-D-xylose biosynthesis. Metabolites have been grouped by compound class using the following designation a: organic acids, b: amino acids, c: fatty acids, d: sugars, e: polyols, f: phosphates, g: N-containing compounds, h: phenylpropanoids/flavonoids, i: terpenoids and j: known and unknowns. In Panel (B), transcripts have been grouped by function and numbered using the following key; 1: carotenoid/Vitamin E biosynthesis, 2: Chlorophyll, 3: photosynthesis, 4: acetyl-CoA biosynthesis, 5: aerobic respiration/TCA cycle, 6: amino acids, 7: ammonia assimilation cycle, 8: anthocyanin biosynthesis, 9: aromatic amino acids, 10: ascorbate biosynthesis, 11: cellulose biosynthesis, 12: colanic acid biosynthesis, 13: cytokinins, 14: ethylene biosynthesis, 15: fatty acid oxidation, 16: phenylpropanoid biosynthesis, 17: gibberellins, 18: gluconate degradation, 19: gluconeogenesis, 20: glycolysis, 21: heme biosynthesis, 22: methylglyoxal degradation, 23: mevalonate pathway, 24: nitrate assimilation pathway, 25: phaseic acid biosynthesis, 26: phospholipases, 27: polyamine biosynthesis, 28: pyrimidine deoxyribonucleotides, 29: removal of superoxide radicals, 30: riboflavin biosynthesis, 31: starch, 32: sterol biosynthesis, 33: sugars, 34: sulphate reduction, 35: tetrapyrrole biosynthesis, 36: tRNA charging pathway. Metabolites have been grouped by compound class using the following designation, a: organic acids, b: amino acids, c: fatty acids, d: sugars, e: polyols, f: phosphates, g: N-containing compounds, h: phenylpropanoids/flavonoids, i: terpenoids, j: known and unknowns. In panel (C) Transcripts have been grouped by function and numbered using the following key; 1: acetyl-CoA biosynthesis, 2: acyl-ACP thioesterase pathway, 3: aerobic respiration/TCA cycle, 4: amino acids, 5: ammonia assimilation cycle, 6: anthocyanin biosynthesis, 7: aromatic amino acids, 8: ascorbate biosynthesis, 9: carotenoid biosynthesis, 10: cellulose biosynthesis, 11: chlorophyll, 12: choline biosynthesis, 13: chorismate biosynthesis, 14: colanic acid biosynthesis, 15: cytokinins, 16: epicuticular wax biosynthesis, 17: ethylene biosynthesis, 18: fatty acid oxidation, 19: phenylpropanoid biosynthesis, 20: gibberellins, 21: gluconate degradation, 22: gluconeogenesis, 23: glutathione biosynthesis, 24: glycolysis, 25: heme biosynthesis, 26: homogalacturonan degradation, 27: IAA biosynthesis, 28: methylerythritol phosphate pathway, 29: methylglyoxal degradation, 30: mevalonate pathway, 31: nitrate assimilation pathway, 32: phospholipases, 33: photosynthesis, 34: phytl-PP biosynthesis, 35: plastoquinone biosynthesis, 36: polyamine biosynthesis, 37: purine nucleotides, 38: pyrimidine deoxyribonucleotides, 39: removal of superoxide radicals, 40: starch, 41: sterol biosynthesis, 42: sugars, 43: sulphate reduction, 44: tetrahydrofolate biosynthesis, 45: tetrapyrrole biosynthesis, 46: triacylglycerol degradation, 47: tRNA charging pathway, 48: UDP-D-xylose biosynthesis. Metabolites have been grouped by compound class using the following designation a: organic acids, b: amino acids, c: fatty acids, d: sugars, e: polyols, f: phosphates, g: N-containing compounds, h: phenylpropanoids/flavonoids, i: terpenoids and j: known and unknowns. Transcripts for genes of unknown function have not been included into the data matrix; in contrast metabolites classified as “known unknowns” were incorporated. Pearson correlation coefficients ( $r$ ) were calculated using datasets for all the *DET1* genotypes, with triplicate biological replication per genotype, calculations were carried out using BioSynLab software ([www.Biosynlab.com](http://www.Biosynlab.com)). The degree of correlation was selected as 0.8 and -0.8 for positive and negative correlations respectively. These values are represented by a false colour scale where a red coloration indicates a negative correlation and green indicates a positive correlation.

**Supplemental Table 1. The stability of the increased carotenoid phenotype in *DET1* lines over the T<sub>3</sub> to T<sub>5</sub> generations.**

The T56 is the background used. 2A11, TFM7 and P119 lines are the different transgenic genotypes developed. Data displayed is represented in fold change relative to the T56 control. The total carotenoid contents of T56 ranged from 321.7 +/- 8.7 to 708 +/- 14.0 mg/g DW. Therefore data are represented as relative increases compared to the respective control (T56) grown simultaneously with each group. A minimum of three representative fruit from each of the six plants generated per genotype were harvested and pooled. Three technical replicate measurements were carried out on each of the biological replications. The data are presented as mean +/- SD. Student *t*-tests were used to determine significant differences, between pairwise comparison between the wild type and the transgenic varieties. *P*<0.001 is indicated by \*\*\* respectively.

|               | Carotenoid content (-fold increase) |         |         |
|---------------|-------------------------------------|---------|---------|
|               | 2A11                                | TFM7    | P119    |
| T3 Generation | 2.3 ***                             | 3.0 *** | 6.0 *** |
| T4 Generation | 2.4 ***                             | 7.3 *** | 8.8 *** |
| T5 Generation | 2.3 ***                             | 3.0 *** | 5.9 *** |

**Supplemental Table 2. Metabolite levels of *DET1* varieties relative to their respective controls at the mature green (A) and ripe fruit (B) stages.**

Data has been compiled from multiple analytical platforms as outlined in the methods section. Data have been normalized to sample weight and expressed relative to their wild type either at the mature green (40 days after anthesis or ripe stage 7 days after breaking. Values are represented as means  $\pm$  SD. P values are shown as  $<0.001$ ,  $0.01$  and  $0.05$  by \*\*\*, \*\* and \* respectively.  $\sim 10.0$  is an arbitrary unit representing an increase in a metabolite in one line while being absent in another. –indicates not determined, bold indicates a statistically significant increase. ND-not detected in one of the pairwise ratios. Abbreviations for the site of synthesis are MT-mitochondria, CY-cytosol, PL-plastid and PE-peroxisomes.

**A**

| Metabolite           | Main site of synthesis | 2A11                                 | TFM7                                 | P119                                 |
|----------------------|------------------------|--------------------------------------|--------------------------------------|--------------------------------------|
| <b>Organic Acids</b> |                        |                                      |                                      |                                      |
| Aconitic acid        | MT                     | n/d                                  | n/d                                  | n/d                                  |
| Ascorbic acid        | CY                     | 1.47 $\pm$ 0.35                      | <b>1.69 <math>\pm</math> 0.09*</b>   | 0.95 $\pm$ 0.32                      |
| Benzoic acid         | CY                     | n/d                                  | n/d                                  | n/d                                  |
| Citramalic           | CY                     | 1.24 $\pm$ 0.62                      | <b>2.33 <math>\pm</math> 0.33**</b>  | 1.34 $\pm$ 0.35                      |
| Citric acid          | MT                     | <b>1.36 <math>\pm</math> 0.31*</b>   | <b>2.71 <math>\pm</math> 0.09**</b>  | 0.87 $\pm$ 0.23                      |
| Dehydroascorbic acid | CY                     | <b>4.86 <math>\pm</math> 1.88***</b> | <b>4.36 <math>\pm</math> 0.29***</b> | <b>6.06 <math>\pm</math> 1.43***</b> |
| Fumaric acid         | MT                     | <b>0.41 <math>\pm</math> 0.16**</b>  | 0.70 $\pm$ 0.10                      | <b>0.38 <math>\pm</math> 0.06**</b>  |
| Galactonic acid      | CY                     | <b>1.42 <math>\pm</math> 0.23**</b>  | 1.10 $\pm$ 0.04                      | <b>1.38 <math>\pm</math> 0.15***</b> |
| Galacturonic acid    | CY                     | n/d                                  | n/d                                  | n/d                                  |
| Glucaric acid        | CY                     | <b>0.68 <math>\pm</math> 0.29*</b>   | 1.08 $\pm$ 0.09                      | <b>0.39 <math>\pm</math> 0.12***</b> |
| Gluconic acid        | CY                     | 1.00 $\pm$ 0.10                      | 1.02 $\pm$ 0.12                      | <b>1.17 <math>\pm</math> 0.11**</b>  |
| Glycerate            | CY                     | <b>1.67 <math>\pm</math> 0.41**</b>  | 1.51 $\pm$ 0.58                      | <b>2.83 <math>\pm</math> 0.43***</b> |
| Glycolate            | PL                     | 0.88 $\pm$ 0.32                      | 1.34 $\pm$ 0.30                      | <b>1.33 <math>\pm</math> 0.17**</b>  |
| Lactic acid          | CY                     | 1.57 $\pm$ 0.66                      | <b>2.40 <math>\pm</math> 0.42**</b>  | <b>1.81 <math>\pm</math> 0.53**</b>  |
| Malic acid           | MT/CY                  | <b>0.70 <math>\pm</math> 0.10***</b> | 0.80 $\pm$ 0.15                      | <b>0.47 <math>\pm</math> 0.05***</b> |
| Oxalic acid          | CY                     | 1.25 $\pm$ 1.11                      | 2.24 $\pm$ 2.21                      | 1.00 $\pm$ 0.28                      |
| 2-Oxoglutaric acid   | MT                     | n/d                                  | n/d                                  | n/d                                  |
| Quinic acid          | CY                     | <b>2.28 <math>\pm</math> 0.43***</b> | <b>2.10 <math>\pm</math> 0.45*</b>   | <b>1.79 <math>\pm</math> 0.25**</b>  |
| Succinic acid        | MT                     | 1.16 $\pm$ 0.20                      | <b>2.02 <math>\pm</math> 0.58*</b>   | <b>3.47 <math>\pm</math> 0.97***</b> |
| Tartaric acid        | CY                     | 1.26 $\pm$ 0.36                      | <b>1.71 <math>\pm</math> 0.07***</b> | <b>2.13 <math>\pm</math> 0.32***</b> |
| <b>Amino Acids</b>   |                        |                                      |                                      |                                      |
| Alanine              | PL                     | <b>0.58 <math>\pm</math> 0.07**</b>  | <b>0.38 <math>\pm</math> 0.24*</b>   | 0.76 $\pm$ 0.19                      |
| B-alanine            | CY                     | <b>0.63 <math>\pm</math> 0.16**</b>  | 0.86 $\pm$ 0.27                      | <b>0.25 <math>\pm</math> 0.04***</b> |
| 4-Aminobutyric acid  | CY/PL                  | 0.84 $\pm$ 0.13                      | 0.72 $\pm$ 0.37                      | <b>0.48 <math>\pm</math> 0.05***</b> |
| Asparagine           | CY                     | <b>0.29 <math>\pm</math> 0.15***</b> | <b>0.38 <math>\pm</math> 0.16**</b>  | <b>0.11 <math>\pm</math> 0.04***</b> |
| Aspartic acid        | CY                     | <b>0.51 <math>\pm</math> 0.12***</b> | 1.16 $\pm$ 0.47                      | <b>0.15 <math>\pm</math> 0.04***</b> |
| Cysteine             | PL                     | n/d                                  | n/d                                  | n/d                                  |
| Glutamic acid        | PL/CY                  | <b>0.56 <math>\pm</math> 0.15*</b>   | <b>2.21 <math>\pm</math> 0.12***</b> | <b>0.44 <math>\pm</math> 0.12**</b>  |
| Glutamine            | PL/CY                  | <b>0.25 <math>\pm</math> 0.11**</b>  | 0.78 $\pm$ 0.046                     | <b>0.04 <math>\pm</math> 0.02***</b> |
| Glycine              | CY(PE)                 | <b>0.42 <math>\pm</math> 0.06***</b> | <b>0.49 <math>\pm</math> 0.02***</b> | <b>0.13 <math>\pm</math> 0.01***</b> |
| 5-Hydroxytryptamine  | PL                     | 0.70 $\pm$ 0.09                      | 0.90 $\pm$ 0.05                      | <b>0.37 <math>\pm</math> 0.07***</b> |
| Leucine              | PL                     | <b>0.45 <math>\pm</math> 0.25***</b> | 0.57 $\pm$ 0.21                      | <b>0.06 <math>\pm</math> 0.01***</b> |
| Lysine               | PL                     | 1.77 $\pm$ 0.42                      | 1.74 $\pm$ 1.1                       | <b>1.78 <math>\pm</math> 0.14*</b>   |
| 5-Oxo-proline        | CY                     | <b>0.35 <math>\pm</math> 0.10***</b> | 0.81 $\pm$ 0.19                      | <b>0.15 <math>\pm</math> 0.01***</b> |
| Serine               | MT                     | <b>0.52 <math>\pm</math> 0.10***</b> | 0.78 $\pm$ 0.46                      | <b>0.18 <math>\pm</math> 0.03***</b> |
| Threonine            | PL                     | <b>0.39 <math>\pm</math> ***</b>     | <b>0.71 <math>\pm</math> 0.06**</b>  | <b>0.09 <math>\pm</math> 0.01***</b> |
| Valine               | PL                     | <b>0.42 <math>\pm</math> 0.11***</b> | <b>0.37 <math>\pm</math> 0.13**</b>  | <b>0.13 <math>\pm</math> 0.02***</b> |
| <b>Fatty Acids</b>   |                        |                                      |                                      |                                      |

|                                  |       |                      |                      |                       |
|----------------------------------|-------|----------------------|----------------------|-----------------------|
| Linoleic acid                    | CY    | <b>0.53 ±0.16**</b>  | <b>0.70 ±0.07*</b>   | <b>0.66 ±0.18*</b>    |
| Oleic acid                       | CY    | <b>0.55 ±0.27*</b>   | 1.60 ±1.03           | 0.79 ±0.22            |
| Palmitic acid                    | PL    | <b>0.61 ±0.27**</b>  | 1.28 ±0.09           | <b>0.74 ±0.12**</b>   |
| Stearic acid                     | CY    | <b>0.39 ±0.39**</b>  | 1.52 ±0.71           | <b>0.21 ±0.03***</b>  |
| <b>Sugars</b>                    |       |                      |                      |                       |
| Arabinose                        | CY    | 1.00 ±0.32           | 1.80 ±0.88           | <b>1.39 ±0.24**</b>   |
| Fructose                         | CY    | 0.78 ±0.24           | 0.95 ±0.16           | <b>0.78 ±0.14*</b>    |
| Gentiobiose                      | CY    | 0.82 ±0.17           | <b>3.28 ±0.16***</b> | 1.27 ±0.27            |
| Glucose                          | CY/PL | <b>1.50 ±0.28**</b>  | 1.38 ±0.45           | 1.28 ±0.37            |
| Maltose                          | PL    | 0.79 ±0.46           | 2.05 ±0.56           | 0.96 ±0.12            |
| Melizitose                       | CY    | 1.40 ±0.56           | 0.36 ±0.16           | 1.10 ±1.06            |
| Rhamnose                         | CY    | 0.001 ±0.0004        | <b>2.42 ±0.05*</b>   | 0.001 ±0.0004         |
| Ribose                           | CY    | 0.84 ±0.23           | 1.18 ±0.12           | <b>1.68 ±0.67*</b>    |
| Sucrose                          | CY    | 1.07 ±0.73           | <b>0.23 ±0.05***</b> | 0.93 ±0.31            |
| Sugar - similar fructose         |       | 0.73 ±0.28           | 0.89 ±0.16           | <b>0.73 ±0.15*</b>    |
| Sugar (unknown 4b)               |       | n/d                  | n/d                  | n/d                   |
| Xylose                           | CY/PL | 1.09 ±0.14           | 1.51 ±0.63           | 1.10 ±0.16            |
| <b>Polyols</b>                   |       |                      |                      |                       |
| Erythritol                       | PL    | <b>1.23 ±0.09**</b>  | 1.50 ±0.27           | <b>1.48 ±0.11***</b>  |
| Glycerol                         | CY/PL | 1.07 ±0.27           | 4.27 ±2.84           | <b>1.92 ±0.25***</b>  |
| Inositol                         | CY    | <b>1.37 ±0.25*</b>   | <b>1.57 ±0.17*</b>   | <b>1.14 ±0.12*</b>    |
| Mannitol                         | CY    | 2.30 ±0.46           | 0.88 ±0.61           | 1.17 ±0.40            |
| <b>Phosphates</b>                |       |                      |                      |                       |
| Fructose-6-phosphate             | PL/CY | 1.00 ±0.14           | 1.03 ±0.07           | <b>0.50 ±0.15***</b>  |
| Glucose-6-phosphate              | PL/CY | 1.01 ±0.34           | 0.97 ±0.15           | <b>0.58 ±0.14**</b>   |
| Glycerol-3-phosphate             | CY    | 0.84 ±0.20           | 1.37 ±0.20           | <b>0.54 ±0.06***</b>  |
| Inositol-6-phosphate             | CY    | <b>0.74 ±0.13*</b>   | 1.06 ±0.24           | <b>0.63 ±0.16**</b>   |
| Phosphate                        |       | 0.90 ±0.10           | 0.91 ±0.04           | <b>0.84 ±0.09*</b>    |
| Sedoheptulose phosphate          | PL    | <b>2.82 ±0.31***</b> | 3.58 ±2.29           | <b>9.86 ±3.31***</b>  |
| Sorbitol-6-phosphate             | PL    | 0.95 ±0.05           | <b>0.64 ±0.01*</b>   | <b>0.37 ±0.07**</b>   |
| <b>N-Containing Compounds</b>    |       |                      |                      |                       |
| Putrescine                       | CY    | 1.05 ±0.48           | 1.25 ±0.33           | 1.01 ±0.62            |
| <b>Known Unknowns</b>            |       |                      |                      |                       |
| Unknown acid (like galacturonic) |       | 1.08 ±0.15           | <b>1.32 ±0.07*</b>   | 1.11 ±0.13            |
| Unknown 15                       |       | <b>0.34 ±0.18***</b> | 0.80 ±0.12           | <b>0.20 ±0.06***</b>  |
| Unknown 305                      |       | 0.00                 | 1.70 ±0.51           | n/d                   |
| Unknown acid 554-1               |       | 1.26 ±0.29           | 0.77 ±0.11           | <b>2.92 ±0.55***</b>  |
| Unknown acid 554-2               |       | <b>2.05 ±0.66*</b>   | <b>1.80 ±0.08**</b>  | <b>8.25 ±4.64**</b>   |
| Unknown acid 554-3               |       | <b>1.85 ±0.62*</b>   | <b>1.49 ±0.07**</b>  | <b>7.29 ±3.65**</b>   |
| Unknown acid 554-4               |       | <b>1.62 ±0.45**</b>  | <b>1.43 ±0.04***</b> | <b>2.24 ±0.59**</b>   |
| Unknown 670                      |       | n/d                  | n/d                  | n/d                   |
| <b>Isoprenoids</b>               |       |                      |                      |                       |
| β-Carotene                       | PL    | <b>2.41 ±0.71*</b>   | <b>7.33 ±1.63**</b>  | <b>8.83 ±1.10**</b>   |
| Lutein                           | PL    | <b>2.44 ±0.16***</b> | <b>6.82 ±0.25***</b> | <b>8.51 ±0.10***</b>  |
| Lycopene                         | PL    | n/d                  | n/d                  | n/d                   |
| Neurosporene                     | PL    | n/d                  | n/d                  | n/d                   |
| Neoxanthin                       | PL    | <b>3.06 ±0.35**</b>  | <b>7.26 ±0.33***</b> | <b>7.82 ±0.55***</b>  |
| Phytoene                         | PL    | n/d                  | n/d                  | n/d                   |
| Phytofluene                      | PL    | n/d                  | n/d                  | n/d                   |
| Violaxanthin                     | PL    | <b>3.10 ±0.15***</b> | <b>9.83 ±0.20***</b> | <b>9.07 ±0.54***</b>  |
| Chlorophyll a                    | PL    | <b>3.50 ±0.50**</b>  | <b>11.04 ±0.98**</b> | <b>10.57 ±0.20***</b> |
| Chlorophyll b                    | PL    | <b>3.03 ±0.11***</b> | <b>7.55 ±0.12***</b> | <b>7.38 ±0.27***</b>  |
| α-Tocopherol                     | PL    | 1.73 ±0.94           | 2.13 ±1.49           | <b>3.27 ±1.18**</b>   |
| Amyrin                           | CY    | <b>1.74 ±0.34**</b>  | <b>2.86 ±0.28***</b> | <b>2.53 ±0.16***</b>  |
| Campesterol                      | CY    | <b>1.77 ±0.49**</b>  | <b>2.46 ±0.24***</b> | <b>1.89 ±0.29***</b>  |
| Cycloartenol                     | CY    | <b>3.05 ±1.88*</b>   | <b>3.25 ±1.20**</b>  | <b>5.67 ±0.72***</b>  |
| Sitosterol                       | CY    | <b>1.24 ±0.27</b>    | <b>1.37 ±0.13**</b>  | <b>1.28 ±0.11*</b>    |
| Stigmasterol                     | CY    | <b>1.75 ±0.69*</b>   | <b>2.08 ±0.43***</b> | 1.20 ±0.2             |

| <b>Phenylpropanoids</b> |    |                       |                       |                      |
|-------------------------|----|-----------------------|-----------------------|----------------------|
| 5-Caffeoylquinic acid   | CY | <b>10.30 ±0.3</b>     | <b>10.40 ±0.003</b>   | <b>9.79 ±0.01</b>    |
| Caffeoylquinic          | CY | <b>8.24 ±0.02</b>     | <b>3.64 ±0.36</b>     | <b>10.50 ±0.01</b>   |
| chlorogenic acid        | CY | <b>10.30 ±0.0001</b>  | <b>10.40 ±0.03</b>    | <b>10.50 ±0.0002</b> |
| Naringenin              | CY | n/d                   | n/d                   | n/d                  |
| Naringenin-chalcone     | CY | n/d                   | n/d                   | 10.50 ±0.01          |
| Quercetin derivative 1  | CY | <b>11.63 ±5.89**</b>  | <b>11.14 ±2.23***</b> | <b>5.32 ±0.40***</b> |
| Quercetin derivative 2  | CY | <b>30.52 ±15.53**</b> | <b>17.72 ±2.39***</b> | <b>9.38 ±0.55***</b> |

## B

| <b>Metabolite</b>    | <b>Main site of synthesis</b> | <b>2A11</b>          | <b>TFM7</b>          | <b>P119</b>          |
|----------------------|-------------------------------|----------------------|----------------------|----------------------|
| <b>Organic Acids</b> |                               |                      |                      |                      |
| Aconitic acid        | MT                            | n/d                  | <b>0.64 ±0.08***</b> | 0.85 ±.29            |
| Ascorbic acid        | CY                            | <b>2.08 ±0.75**</b>  | <b>2.93 ±1.73*</b>   | <b>6.25 ±2.59**</b>  |
| Benzoic acid         | CY                            | 1.08 ±0.17           | 1.08 ±0.12           | 1.05 ±0.09           |
| Citramalic           | CY                            | 1.03 ±0.21           | <b>0.75 ±0.07*</b>   | <b>0.45 ±0.08***</b> |
| Citric acid          | MT                            | 1.02 ±0.09           | 0.92 ±0.22           | 0.82 ±0.10           |
| Dehydroascorbic acid | CY                            | 1.29 ±0.70           | 1.98 ±0.40           | <b>7.13 ±1.84***</b> |
| Fumaric acid         | MT                            | <b>0.67 ±0.18**</b>  | <b>0.42 ±0.65***</b> | <b>0.65 ±0.16***</b> |
| Galactonic acid      | CY                            | 1.05 ±0.25           | 0.87 ±0.21           | 1.35 ±0.36           |
| Galacturonic acid    | CY                            | 0.89 ±0.34           | <b>1.30 ±0.12*</b>   | 1.21 ±0.32           |
| Glucaric acid        | CY                            | 0.83 ±0.16           | <b>0.55 ±0.14*</b>   | 0.68 ±0.09           |
| Gluconic acid        | CY                            | 1.11 ±0.13           | 0.82 ±0.19           | 0.90 ±0.14           |
| Glycerate            | CY                            | 0.89 ±0.10           | <b>0.54 ±0.08**</b>  | 0.81 ±0.09           |
| Glycolate            | PL                            | <b>1.80 ±0.56**</b>  | <b>1.58 ±0.36*</b>   | <b>2.34 ±0.27***</b> |
| Lactic acid          | CY                            | <b>1.72 ±0.58*</b>   | <b>1.37 ±0.25*</b>   | <b>1.75 ±0.57*</b>   |
| Malic acid           | MT/CY                         | 0.67 ±0.08           | <b>0.34 ±0.01**</b>  | <b>0.35 ±0.11**</b>  |
| Oxalic acid          | CY                            | <b>2.13 ±0.99*</b>   | <b>2.50 ±1.37*</b>   | <b>4.67 ±2.61**</b>  |
| 2-Oxoglutaric acid   | MT                            | <b>1.54 ±0.34**</b>  | <b>1.44 ±0.30*</b>   | <b>1.52 ±0.28**</b>  |
| Quinic acid          | CY                            | <b>1.57 ±0.11***</b> | <b>1.67 ±0.21***</b> | <b>3.64 ±0.71***</b> |
| Succinic acid        | MT                            | <b>1.86 ±0.27**</b>  | <b>2.11 ±0.24***</b> | <b>2.68 ±0.86**</b>  |
| Tartaric acid        | CY                            | 1.01 ±0.12           | 0.81 ±0.10           | <b>1.76 ±0.24***</b> |
| <b>Amino Acids</b>   |                               |                      |                      |                      |
| Alanine              | PL                            | 1.38 ±0.36           | 1.61 ±0.62           | <b>5.35 ±1.63***</b> |
| B-alanine            | CY                            | <b>0.72 ±0.05***</b> | <b>0.32 ±0.04***</b> | <b>0.64 ±0.10***</b> |
| 4-Aminobutyric acid  | CY/PL                         | 0.94 ±0.12           | <b>0.65 ±0.11**</b>  | <b>0.72 ±0.07**</b>  |
| Asparagine           | CY                            | <b>0.27 ±0.20***</b> | <b>0.22 ±0.15***</b> | 0.64 ±0.50           |
| Aspartic acid        | CY                            | <b>0.67 ±0.15*</b>   | 1.02 ±0.48           | 1.06 ±0.23           |
| Cysteine             | PL                            | 0.77 ±0.42           | 0.80 ±0.44           | <b>1.52 ±0.30**</b>  |
| Glutamic acid        | PL/CY                         | 0.62 ±0.32           | 1.67 ±0.45           | n/d                  |
| Glutamine            | PL/CY                         | <b>0.30 ±0.24**</b>  | <b>0.21 ±0.16**</b>  | <b>0.41 ±0.37*</b>   |
| Glycine              | CY(PE)                        | <b>0.58 ±0.12***</b> | <b>0.26 ±0.02***</b> | <b>0.51 ±0.18***</b> |
| 5-Hydroxytryptamine  | PL                            | 0.89 ±0.18           | <b>0.75 ±0.04***</b> | <b>0.67 ±0.11***</b> |
| Leucine              | PL                            | <b>0.45 ±0.26**</b>  | <b>0.22 ±0.04***</b> | <b>0.36 ±0.08***</b> |
| Lysine               | PL                            | <b>1.37 ±0.21**</b>  | 1.14 ±0.33           | 1.04 ±0.27           |
| 5-Oxo-proline        | CY                            | <b>0.70 ±0.26*</b>   | 0.94 ±0.44           | 0.83 ±0.29           |
| Serine               | MT                            | <b>0.68 ±0.21**</b>  | <b>0.26 ±0.05***</b> | <b>0.41 ±0.13***</b> |
| Threonine            | PL                            | <b>0.54 ±0.33**</b>  | <b>0.39 ±0.09***</b> | <b>0.55 ±0.16***</b> |
| Valine               | PL                            | <b>0.47 ±0.21***</b> | <b>0.14 ±0.02***</b> | <b>0.45 ±0.07***</b> |
| <b>Fatty Acids</b>   |                               |                      |                      |                      |
| Linoleic acid        | CY                            | 1.12 ±0.75           | 1.52 ±0.48           | <b>2.35 ±0.84*</b>   |
| Oleic acid           | CY                            | 1.24 ±1.00           | 1.41 ±0.54           | <b>2.77 ±0.61**</b>  |
| Palmitic acid        | PL                            | 1.05 ±0.17           | 1.42 ±0.39           | <b>2.22 ±0.37***</b> |

|                                  |       |                      |                      |                       |
|----------------------------------|-------|----------------------|----------------------|-----------------------|
| Stearic acid                     | CY    | 0.97 ±0.37           | 1.33 ±0.69           | <b>1.69 ±0.38*</b>    |
| <b>Sugars</b>                    |       |                      |                      |                       |
| Arabinose                        | CY    | 0.71 ±0.20           | 0.80 ±0.26           | 0.93 ±0.17            |
| Fructose                         | CY    | 1.18 ±0.24           | 0.84 ±0.24           | <b>0.61 ±0.09**</b>   |
| Gentiobiose                      | CY    | <b>2.25 ±0.99*</b>   | <b>2.57 ±1.53*</b>   | <b>2.56 ±0.22***</b>  |
| Glucose                          | CY/PL | 1.06 ±0.24           | 0.99 ±0.15           | 1.28 ±0.63            |
| Maltose                          | PL    | <b>3.87 ±2.06**</b>  | <b>2.99 ±1.83*</b>   | <b>5.08 ±1.29***</b>  |
| Melizitose                       | CY    | 2.79 ±1.54           | <b>2.75 ±0.21**</b>  | <b>3.06 ±0.66**</b>   |
| Rhamnose                         | CY    | 0.01 ±0.001          | 0.01 ±0.005          | 0.02 ±0.003           |
| Ribose                           | CY    | 0.64 ±0.48           | 0.75 ±0.58           | 1.06 ±0.84            |
| Sucrose                          | CY    | <b>1.70 ±0.67*</b>   | <b>3.74 ±0.10***</b> | 1.27 ±0.62            |
| Sugar - similar fructose         |       | 1.17 ±0.34           | 0.77 ±0.24           | <b>0.52 ±0.09***</b>  |
| Sugar (unknown 4b)               |       | 0.96 ±0.15           | 0.94 ±0.14           | <b>1.35 ±0.24*</b>    |
| Xylose                           | CY/PL | <b>0.77 ±0.14**</b>  | 1.04 ±0.22           | <b>1.46 ±0.17***</b>  |
| <b>Polyols</b>                   |       |                      |                      |                       |
| Erythritol                       | PL    | 1.15 ±0.18           | <b>1.35 ±0.10***</b> | <b>2.01 ±0.26***</b>  |
| Glycerol                         | CY/PL | <b>1.29 ±0.20*</b>   | <b>1.50 ±0.12***</b> | <b>1.37 ±0.17**</b>   |
| Inositol                         | CY    | <b>1.63 ±0.34**</b>  | <b>1.92 ±0.39***</b> | <b>2.65 ±0.37***</b>  |
| Mannitol                         | CY    | 0.53 ±0.09           | 1.16 ±0.55           | <b>2.70 ±0.4***</b>   |
| <b>Phosphates</b>                |       |                      |                      |                       |
| Fructose-6-phosphate             | PL/CY | 1.29 ±0.40           | 1.11 ±0.28           | 0.97 ±0.18            |
| Glucose-6-phosphate              | PL/CY | <b>2.11 ±0.33**</b>  | 1.48 ±0.67           | <b>1.80 ±0.42**</b>   |
| Glycerol-3-phosphate             | CY    | <b>0.69 ±0.03***</b> | <b>0.75 ±0.15**</b>  | <b>0.68 ±0.13***</b>  |
| Inositol-6-phosphate             | CY    | 1.16 ±0.21           | 1.07 ±0.22           | <b>1.93 ±0.74*</b>    |
| Phosphate                        |       | 1.03 ±0.12           | 0.93 ±0.03           | 1.07 ±0.12            |
| Sedoheptulose phosphate          | PL    | 1.06 ±0.30           | <b>1.98 ±0.85*</b>   | 1.04 ±0.55            |
| Sorbitol-6-phosphate             | PL    | 1.47 ±0.62           | 0.88 ±0.29           | 1.82 ±0.39**          |
| <b>N-Containing Compounds</b>    |       |                      |                      |                       |
| Putrescine                       | CY    | <b>0.61 ±0.08***</b> | <b>0.50 ±0.08***</b> | <b>1.37 ±0.19**</b>   |
| <b>Known Unknowns</b>            |       |                      |                      |                       |
| Unknown acid (like galacturonic) |       | 0.95 ±0.13           | 1.16 ±0.10           | <b>1.48 ±0.33*</b>    |
| Unknown 15                       |       | <b>0.48 ±0.09*</b>   | 0.86 ±0.19           | <b>0.41 ±0.03*</b>    |
| Unknown 305                      |       | <b>15.52 ±5.10*</b>  | 0.23 ±0.02           | 0.12 ±0.02            |
| Unknown acid 554-1               |       | 1.03 ±0.09           | 1.28 ±0.26           | 0.94 ±0.03            |
| Unknown acid 554-2               |       | 1.15 ±0.19           | 1.33 ±0.42           | 0.86 ±0.38            |
| Unknown acid 554-3               |       | 1.18 ±0.23           | 1.21 ±0.48           | 0.76 ±0.37            |
| Unknown acid 554-4               |       | 1.31 ±0.29           | 1.29 ±0.41           | <b>2.39 ±0.55***</b>  |
| Unknown 670                      |       | <b>0.34 ±0.10***</b> | 1.16 ±0.36           | <b>1.60 ±0.39*</b>    |
| <b>Isoprenoids</b>               |       |                      |                      |                       |
| β-Carotene                       | PL    | <b>2.25 ±0.15**</b>  | <b>4.30 ±0.29**</b>  | <b>7.35 ±0.34***</b>  |
| Lutein                           | PL    | <b>1.83 ±0.08**</b>  | <b>3.43 ±0.10***</b> | <b>9.77 ±0.03***</b>  |
| Lycopene                         | PL    | <b>2.25 ±0.07***</b> | <b>2.97 ±0.09***</b> | <b>4.90 ±0.07***</b>  |
| Neurosporene                     | PL    | n/d                  | n/d                  | 14.26 ±12.70          |
| Neoxanthin                       | PL    | n/d                  | n/d                  | n/d                   |
| Phytoene                         | PL    | <b>2.44 ±0.06***</b> | <b>1.06 ±0.02*</b>   | <b>4.51 ±0.01***</b>  |
| Phytofluene                      | PL    | <b>3.54 ±0.28**</b>  | <b>1.68 ±0.08***</b> | <b>8.96 ±0.13***</b>  |
| Violaxanthin                     | PL    | 1.19 ±1.0            | 2.05 ±1.79           | <b>12.11 ±0.48***</b> |
| Chlorophyll a                    | PL    | n/d                  | n/d                  | n/d                   |
| Chlorophyll b                    | PL    | n/d                  | n/d                  | n/d                   |
| α-Tocopherol                     | PL    | <b>2.47 ±0.85**</b>  | <b>3.07 ±1.34**</b>  | <b>11.41 ±4.04***</b> |
| Amyrin                           | CY    | <b>3.21 ±0.69***</b> | <b>2.40 ±0.39***</b> | 1.23 ±0.20            |
| Campesterol                      | CY    | 1.69 ±0.03           | <b>2.23 ±0.40***</b> | 0.80 ±0.09            |
| Cycloartenol                     | CY    | 1.16 ±0.20           | 0.96 ±0.19           | 0.49 ±0.09            |
| Sitosterol                       | CY    | 1.42 ±0.21           | 1.20 ±0.20           | <b>0.40 ±0.06***</b>  |
| Stigmasterol                     | CY    | 1.45 ±0.12           | <b>1.47 ±0.43*</b>   | <b>0.40 ±0.05***</b>  |
| <b>Phenylpropanoids</b>          |       |                      |                      |                       |
| 5-Caffeoylquinic acid            | CY    | 0.94 ±0.60           | 1.40 ±0.51           | <b>3.51 ±0.71***</b>  |
| Caffeoylquinic                   | CY    |                      |                      |                       |

|                        |    |                    |                      |                       |
|------------------------|----|--------------------|----------------------|-----------------------|
| chlorogenic acid       | CY | <b>3.97 ±2.23*</b> | <b>6.18 ±4.19*</b>   | <b>16.05 ±6.11***</b> |
| Naringenin             | CY |                    |                      |                       |
| Naringenin-chalcone    | CY | 0.54 ±0.51         | <b>0.26 ±0.13***</b> | <b>0.61 ±0.58*</b>    |
| Quercetin derivative 1 | CY | <b>4.42 ±2.65*</b> | <b>3.96 ±1.65**</b>  | <b>7.05 ±1.38***</b>  |
| Quercetin derivative 2 | CY | <b>6.31 ±5.80*</b> | <b>3.78 ±2.76*</b>   | <b>17.23 ±5.03***</b> |

---



**Supplemental Table 3. Changes in relative metabolite levels found in *DET1* varieties during fruit development and ripening.**

The data has been calculated from the relative change in a metabolite from mature green to ripe for all *DET1* varieties compared to their respective wild type (T56). Values are represented as means +/- SD. *P* values are shown as <0.001, 0.01 and 0.05 by \*\*\*, \*\* and \* respectively. ~10.0 is an arbitrary unit representing an increase in a metabolite in one line while being absent in another. –indicates not determined, bold indicates a statistically significant increase. ND-not detected in one of the pairwise ratios. Abbreviations for the site of synthesis are MT-mitochondria, CY-cytosol, PL-plastid and PE-peroxisomes.

| Metabolite           | Main site of synthesis | T56          | 2A11                  | TFM7                 | P119                  |
|----------------------|------------------------|--------------|-----------------------|----------------------|-----------------------|
| <b>Organic acids</b> |                        |              |                       |                      |                       |
| Ascorbic acid        | CY                     | 12.30 ±4.31  | 17.41 ±6.30           | 21.37 ±12.66         | <b>80.54 ±33.43**</b> |
| Citramalic           | CY                     | 10.94 ±2.63  | 9.05 ±1.85            | <b>3.50 ±0.36***</b> | <b>3.65 ±0.65***</b>  |
| Citric acid          | MT                     | 4.06 ±1.52   | 3.05 ±0.28            | <b>1.38 ±0.33**</b>  | 3.82 ±0.50            |
| Dehydroascorbic acid | CY                     | 3.46 ±2.64   | 0.92 ±0.50            | 1.57 ±0.032          | 4.07 ±1.05            |
| Fumaric acid         | MT                     | 0.46 ±0.05   | <b>0.74 ±0.21*</b>    | <b>0.27 ±0.04***</b> | <b>0.79 ±0.20**</b>   |
| Galactonic acid      | CY                     | 1.51 ±0.24   | <b>1.11 ±0.27*</b>    | 1.20 ±0.29           | 1.48 ±0.40            |
| Glucaric acid        | CY                     | 1.83 ±0.55   | 2.23 ±0.43            | <b>0.93 ±0.24*</b>   | <b>3.21 ±0.44**</b>   |
| Gluconic acid        | CY                     | 0.78 ±0.12   | 0.87 ±0.11            | 0.62 ±0.15           | <b>0.60 ±0.10*</b>    |
| Glycerate            | CY                     | 0.65 ±0.15   | <b>0.35 ±0.04**</b>   | <b>0.23 ±0.04***</b> | <b>0.18 ±0.02***</b>  |
| Glycolate            | PL                     | 0.31 ±0.12   | <b>0.63 ±0.20**</b>   | 0.37 ±0.08           | <b>0.55 ±0.06**</b>   |
| Lactic acid          | CY                     | 0.50 ±0.12   | 0.55 ±0.19            | <b>0.29 ±0.05**</b>  | 0.49 ±0.16            |
| Malic acid           | MT/CY                  | 0.80 ±0.28   | 0.77 ±0.10            | <b>0.34 ±0.02**</b>  | 0.60 ±0.20            |
| Oxalic acid          | CY                     | 0.66 ±0.27   | 1.13 ±0.52            | 0.74 ±0.41           | <b>3.09 ±1.73*</b>    |
| Quinic acid          | CY                     | 1.31 ±0.27   | <b>0.90 ±0.06**</b>   | 1.04 ±0.13           | <b>2.66 ±0.52***</b>  |
| Succinic acid        | MT                     | 0.78 ±0.37   | <b>1.24 ±0.18*</b>    | 0.81 ±0.09           | 0.60 ±0.19            |
| Tartaric acid        | CY                     | 3.31 ±0.76   | 2.66 ±0.33            | <b>1.58 ±0.20**</b>  | 2.72 ±0.37            |
| <b>Amino acids</b>   |                        |              |                       |                      |                       |
| Alanine              | PL                     | 0.82 ±0.18   | <b>1.95 ±0.52**</b>   | <b>3.42 ±1.34**</b>  | <b>5.78 ±1.77***</b>  |
| B-alanine            | CY                     | 0.94 ±0.07   | <b>1.07 ±0.08*</b>    | <b>0.36 ±0.05***</b> | <b>2.38 ±0.38***</b>  |
| 4-Aminobutyric acid  | CY/PL                  | 1.24 ±0.22   | 1.40 ±0.19            | 1.13 ±0.20           | <b>1.89 ±0.20***</b>  |
| Asparagine           | CY                     | 5.46 ±1.44   | 5.06 ±3.90            | 3.17 ±2.21           | <b>33.03 ±25.77*</b>  |
| Aspartic acid        | CY                     | 3.25 ±1.06   | 4.32 ±1.02            | 2.88 ±1.37           | <b>22.81 ±5.01***</b> |
| Cysteine             | PL                     | 2.92 ±0.74   | <b>27.03 ±14.72**</b> | <b>0.68 ±0.38***</b> | <b>8.50 ±1.68***</b>  |
| Glutamic acid        | PL/CY                  | 40.17 ±22.55 | 44.27 ±23.25          | 30.36 ±8.28          | 62.54 ±31.03          |
| Glutamine            | PL/CY                  | 3.76 ±1.69   | 4.56 ±3.76            | <b>1.02 ±0.78**</b>  | <b>43.29 ±31.03*</b>  |
| Glycine              | CY(PE)                 | 0.92 ±0.08   | <b>1.27 ±0.28*</b>    | <b>0.48 ±0.05***</b> | <b>3.59 ±1.26**</b>   |
| Leucine              | PL                     | 1.09 ±0.11   | 1.07 ±0.64            | <b>0.41 ±0.09***</b> | <b>6.34 ±1.52***</b>  |
| Lysine               | PL                     | 1.45 ±0.17   | <b>1.12 ±0.18*</b>    | <b>0.95 ±0.28*</b>   | <b>0.85 ±0.23**</b>   |
| 5-Oxo-proline        | CY                     | 2.30 ±0.45   | <b>4.59 ±1.71*</b>    | 2.69 ±1.28           | <b>12.68 ±4.56**</b>  |
| Serine               | MT                     | 0.89 ±0.09   | 1.17 ±0.38            | <b>0.29 ±0.07***</b> | <b>2.00 ±0.68**</b>   |
| Threonine            | PL                     | 1.49 ±0.16   | 2.06 ±1.29            | <b>0.81 ±0.19***</b> | <b>9.22 ±2.71***</b>  |
| Valine               | PL                     | 0.70 ±0.07   | 0.79 ±0.36            | <b>0.26 ±0.04***</b> | <b>2.49 ±0.43***</b>  |
| <b>Fatty acids</b>   |                        |              |                       |                      |                       |
| Linoleic acid        | CY                     | 0.20 ±0.06   | 0.42 ±0.28            | <b>0.43 ±0.14**</b>  | <b>0.71 ±0.26*</b>    |
| Oleic acid           | CY                     | 0.33 ±0.27   | 0.73 ±0.60            | 0.29 ±0.11           | <b>1.15 ±0.26***</b>  |
| Palmitic acid        | PL                     | 0.38 ±0.13   | <b>0.66 ±0.11**</b>   | 0.43 ±0.12           | <b>1.15 ±0.19***</b>  |
| Stearic acid         | CY                     | 0.12 ±0.05   | <b>0.31 ±0.12**</b>   | 0.11 ±0.06           | <b>0.97 ±0.22***</b>  |
| <b>Sugars</b>        |                        |              |                       |                      |                       |

|                                  |       |              |                      |                       |                      |
|----------------------------------|-------|--------------|----------------------|-----------------------|----------------------|
| Arabinose                        | CY    | 3.29 ±1.84   | 2.33 ±0.68           | 1.46 ±0.49            | 2.21 ±0.41           |
| Fructose                         | CY    | 0.61 ±0.12   | <b>0.93 ±0.19**</b>  | 0.54 ±0.15            | <b>0.47 ±0.08*</b>   |
| Gentiobiose                      | CY    | 2.43 ±0.35   | <b>6.67 ±2.96*</b>   | 1.90 ±1.14            | <b>4.88 ±0.42***</b> |
| Glucose                          | CY/PL | 1.02 ±0.18   | <b>0.73 ±0.17*</b>   | <b>0.73 ±0.12*</b>    | 1.02 ±0.50           |
| Maltose                          | PL    | 1.25 ±0.83   | <b>6.12 ±3.27**</b>  | 1.83 ±1.12            | <b>6.66 ±1.69***</b> |
| Melizitose                       | CY    | 0.83 ±0.60   | 1.65 ±0.91           | <b>1.64 ±0.13*</b>    | <b>2.30 ±0.50**</b>  |
| Rhamnose                         | CY    | 0.30 ±0.73   | <b>1.74 ±0.44**</b>  | 0.001 ±0.0007         | <b>3.55 ±0.90***</b> |
| Ribose                           | CY    | 6.72 ±3.09   | 5.14 ±3.88           | 4.27 ±3.35            | 4.22 ±3.36           |
| Sucrose                          | CY    | 0.22 ±0.03   | 0.35 ±0.14           | <b>3.57 ±0.10***</b>  | 0.30 ±0.15           |
| Sugar - similar fructose         |       | 0.60 ±0.13   | <b>0.96 ±0.28*</b>   | 0.52 ±0.16            | <b>0.43 ±0.08*</b>   |
| Xylose                           | CY/PL | 4.19 ±0.35   | <b>2.97 ±0.55**</b>  | <b>2.87 ±0.62**</b>   | <b>5.57 ±0.68**</b>  |
| <b>Polyols</b>                   |       |              |                      |                       |                      |
| Erythritol                       | PL    | 1.20 ±0.19   | 1.12 ±0.18           | 1.08 ±0.08            | <b>1.63 ±0.21**</b>  |
| Glycerol                         | CY/PL | 1.41 ±0.28   | 1.70 ±0.27           | <b>0.49 ±0.04***</b>  | <b>1.01 ±0.13**</b>  |
| Inositol                         | CY    | 0.63 ±0.15   | 0.75 ±0.16           | 0.78 ±0.16            | <b>1.47 ±0.21***</b> |
| Mannitol                         | CY    | 0.89 ±0.58   | 0.32 ±0.06           | 1.17 ±0.56            | <b>2.07 ±0.32**</b>  |
| <b>Phosphates</b>                |       |              |                      |                       |                      |
| Fructose-6-phosphate             | PL/CY | 0.97 ±0.34   | 1.25 ±0.40           | 1.05 ±0.27            | <b>1.87 ±0.35**</b>  |
| Glucose-6-phosphate              | PL/CY | 1.39 ±0.28   | <b>2.89 ±0.45**</b>  | 2.12 ±0.97            | <b>4.28 ±1.00**</b>  |
| Glycerol-3-phosphate             | CY    | 0.87 ±0.11   | <b>0.71 ±0.04**</b>  | <b>0.47 ±0.10***</b>  | <b>1.09 ±0.21*</b>   |
| Inositol-6-phosphate             | CY    | 1.16 ±0.29   | <b>1.82 ±0.34**</b>  | 1.18 ±0.25            | <b>3.56 ±1.38**</b>  |
| Phosphate                        |       | 1.13 ±0.11   | 1.30 ±0.16           | 1.15 ±0.05            | <b>1.44 ±0.17**</b>  |
| Sedoheptulose phosphate          | PL    | 40.88 ±13.72 | <b>15.31 ±4.41**</b> | <b>22.57 ±9.81*</b>   | <b>4.29 ±2.31**</b>  |
| Sorbitol-6-phosphate             | PL    | 0.50 ±0.16   | 0.78 ±0.33           | 0.69 ±0.23            | <b>2.48 ±0.54***</b> |
| <b>N-containing compounds</b>    |       |              |                      |                       |                      |
| Putrescine                       | CY    | 14.33 ±1.38  | <b>8.29 ±1.20***</b> | <b>5.74 ±0.94***</b>  | <b>19.35 ±2.71**</b> |
| <b>Known unknowns</b>            |       |              |                      |                       |                      |
| Unknown acid (like galacturonic) |       | 1.23 ±0.20   | 1.09 ±0.16           | 1.09 ±0.10            | 1.65 ±0.37           |
| Unknown 15                       |       | 0.10 ±0.04   | 0.13 ±0.03           | 0.11 ±0.02            | <b>0.20 ±0.02**</b>  |
| Unknown 305                      |       | 0.01 ±0.02   | <b>55.88 ±18.39*</b> | 0.001 ±0.0001         | <b>0.39 ±0.07***</b> |
| Unknown acid 554-1               |       | 7.52 ±1.81   | 6.14 ±0.57           | <b>12.44 ±2.55**</b>  | <b>2.43 ±0.10**</b>  |
| Unknown acid 554-2               |       | 14.27 ±2.92  | <b>8.01 ±1.36**</b>  | 10.54 ±3.33           | <b>1.48 ±0.66***</b> |
| Unknown acid 554-3               |       | 11.47 ±2.57  | <b>7.53 ±1.49*</b>   | 9.59 ±3.82            | <b>1.23 ±0.60***</b> |
| Unknown acid 554-4               |       | 1.20 ±0.34   | 0.97 ±0.22           | 1.08 ±0.35            | 1.28 ±0.30           |
| <b>Isoprenoids</b>               |       |              |                      |                       |                      |
| β-Carotene                       | PL    | 49.77 ±1.32  | 46.45 ±3.20          | <b>29.17 ±2.03***</b> | <b>41.44 ±1.95**</b> |
| Lutein                           | PL    | 1.76 ±0.01   | <b>1.33 ±0.06**</b>  | <b>0.89 ±0.02***</b>  | <b>2.02 ±0.01***</b> |
| Violaxanthin                     | PL    | 1.02 ±0.06   | 0.59 ±0.13           | <b>0.34 ±0.02***</b>  | <b>1.37 ±0.05**</b>  |
| α-Tocopherol                     | PL    | 7.65 ±0.68   | 9.91 ±3.43           | 10.98 ±4.79           | <b>26.75 ±9.46**</b> |
| Amyrin                           | CY    | 1.26 ±0.53   | <b>2.34 ±0.50**</b>  | 1.06 ±0.17            | <b>0.61 ±0.10*</b>   |
| Campesterol                      | CY    | 2.12 ±0.55   | 2.01 ±0.66           | 1.91 ±0.34            | <b>0.89 ±0.11**</b>  |
| Cycloartenol                     | CY    | 1.01 ±0.07   | <b>0.68 ±0.12***</b> | <b>0.53 ±0.10***</b>  | <b>0.16 ±0.02***</b> |
| Sitosterol                       | CY    | 0.85 ±0.16   | 0.98 ±0.14           | 0.74 ±0.21            | <b>0.27 ±0.04***</b> |
| Stigmasterol                     | CY    | 2.58 ±0.22   | <b>2.13 ±0.19**</b>  | <b>1.83 ±0.54**</b>   | <b>0.88 ±0.11***</b> |
| <b>Phenylpropanoids</b>          |       |              |                      |                       |                      |
| Caffeoylquinic                   | CY    | 0.17 ±0.004  | <b>0.04 ±0.02***</b> | <b>0.05 ±0.02***</b>  | 0.19 ±0.05           |
| Quercetin derivative 1           | CY    | 1.51 ±0.55   | <b>0.57 ±0.34**</b>  | <b>0.54 ±0.22**</b>   | 1.99 ±0.39           |
| Quercetin derivative 2           | CY    | 0.88 ±0.50   | <b>0.14 ±0.13**</b>  | <b>0.17 ±0.13**</b>   | <b>1.63 ±0.47*</b>   |

**Supplemental Table 4. Overview of global changes in the transcript levels in the P119 and TFM7 varieties during ripening.**

Only IDs corresponding to a unique transcript and giving a significant signal relative to background (pVal 0.05) were included in the analysis. Total numbers of transcripts statistically qualifying for analysis are indicated (genes). Misregulated genes correspond to a minimum of 2-fold change ratio (up- or down) as compared to wild-type T56.

| <b>P119</b>        | <b>Mature Green</b> | <b>Breaker</b> | <b>Red Ripe</b> |
|--------------------|---------------------|----------------|-----------------|
| Transcripts        | 2586                | 1275           | 1166            |
| Up-regulated       | (22.1%)             | (30.4%)        | (11.7%)         |
| Down-regulated     | (3.8%)              | (0%)           | (2.1%)          |
| Total misregulated | (26.0%)             | (30.4%)        | (13.8%)         |
| <b>TFM7</b>        | <b>Mature Green</b> | <b>Breaker</b> | <b>Red Ripe</b> |
| Transcripts        | 2731                | 3013           | 2756            |
| Up-regulated       | (13.9%)             | (10.8 %)       | (5.3 %)         |
| Down-regulated     | (5.2%)              | (9.6 %)        | (4.6 %)         |
| Total misregulated | (19.2%)             | (20.5 %)       | (9.9 %)         |

**Supplemental Table 5. Hierarchy of pathways significantly affected in P119 (A) and TFM7 (B) *DET1* varieties.**

The 10 most affected pathways at the mature green, breaker and red ripe developmental stages are listed and ranked as sorted using Plant MetGenMap web-based analysis ([www.http://bioinfo.bti.cornell.edu/cgi-bin/MetGenMAP/home.cgi](http://bioinfo.bti.cornell.edu/cgi-bin/MetGenMAP/home.cgi)). For each transcriptome analysis, the plate IDs available for the entire set of transcripts data with  $pVal < 0.05$  has been utilized. The software uses hyper geometric test to check the significance of pathway changes, performed on a set of pathways simultaneously using pValues that correspond to raw p values corrected by False Discovery Rate (FDR). ns, not significantly affected or not determined.

**A**

| P119 Rank | Mature Green                                 |         | Breaker                                      |         | Red Ripe                                                                                    |         |
|-----------|----------------------------------------------|---------|----------------------------------------------|---------|---------------------------------------------------------------------------------------------|---------|
|           | Pathway                                      | pVal    | Pathway                                      | pVal    | Pathway                                                                                     | pVal    |
| 1         | Calvin cycle                                 | 5.1E-12 | Calvin cycle                                 | 1.1E-10 | gluconeogenesis                                                                             | 1.4E-03 |
| 2         | photorespiration                             | 1.2E-08 | photorespiration                             | 2.6E-10 | glycolysis I and IV (plant cytosol)                                                         | 1.4E-03 |
| 3         | gluconeogenesis                              | 5.9E-05 | gluconeogenesis                              | 1.3E-06 | superpathway of glycolysis and TCA variant VIII                                             | 1.4E-03 |
| 4         | xylulose-monophosphate cycle                 | 3.3E-04 | fructose degradation to pyruvate and lactate | 1.4E-06 | superpathway of glycolysis, pyruvate dehydrogenase, TCA, and glyoxylate bypass Calvin cycle | 1.4E-03 |
| 5         | superpathway of glycolysis+Entner-Doudoroff  | 2.5E-03 | superpathway of glycolysis+Entner-Doudoroff  | 9.4E-06 | fructose degradation to pyruvate and lactate                                                | 1.6E-03 |
| 6         | xanthophyll cycle                            | 7.0E-03 | carotenoid biosynthesis                      | 1.8E-05 | superpathway of glycolysis+Entner-Doudoroff                                                 | 1.6E-03 |
| 7         | glycolysis I                                 | 8.3E-03 | sucrose degradation to ethanol and lactate   | 3.1E-05 | photorespiration                                                                            | 1.6E-03 |
| 8         | fructose degradation to pyruvate and lactate | 8.3E-03 | glycolysis I and IV (plant cytosol)          | 5.8E-05 | phenylpropanoid biosynthesis, initial reactions                                             | 1.9E-03 |
| 9         | carotenoid biosynthesis                      | 8.3E-03 | glucose heterofermentation to lactate I      | 2.5E-04 | salicylic acid biosynthesis                                                                 | 1.9E-03 |
| 10        | chlorophyllide a biosynthesis                | 9.3E-03 | xylulose-monophosphate cycle                 | 3.8E-04 |                                                                                             |         |

**B**

| TFM7 | Mature Green                         |         | Breaker                                             |         | Red Ripe                                         |         |
|------|--------------------------------------|---------|-----------------------------------------------------|---------|--------------------------------------------------|---------|
| Rank | Pathway                              | pVal    | Pathway                                             | pVal    | Pathway                                          | pVal    |
| 1    | <b>chlorophyllide a biosynthesis</b> | 6.6E-04 | <b>Calvin cycle</b>                                 | 3.4E-04 | <b>sucrose degradation I</b>                     | 2.5E-04 |
| 2    | <b>tRNA charging pathway</b>         | 6.6E-04 | <b>tRNA charging pathway</b>                        | 3.4E-04 | <b>GDP-mannose metabolism</b>                    | 2.4E-03 |
| 3    | <b>lipoxygenase pathway</b>          | 3.7E-02 | <b>photorespiration</b>                             | 2.2E-03 | <b>colanic acid building blocks biosynthesis</b> | 4.8E-03 |
| 4    | <b>jasmonic acid biosynthesis</b>    | 3.7E-02 | <b>gluconeogenesis</b>                              | 5.4E-03 | <b>lipoxygenase pathway</b>                      | 7.1E-03 |
| 5    |                                      |         | <b>xylulose-monophosphate cycle</b>                 | 5.4E-03 | <b>jasmonic acid biosynthesis</b>                | 9.4E-03 |
| 6    |                                      |         | <b>chlorophyllide a biosynthesis</b>                | 1.3E-02 | <b>ascorbate biosynthesis</b>                    | 3.3E-02 |
| 7    |                                      |         | <b>fructose degradation to pyruvate and lactate</b> | 2.2E-02 | <b>mannose degradation</b>                       | 3.3E-02 |
| 8    |                                      |         | <b>sucrose degradation to ethanol and lactate</b>   | 2.8E-02 | <b>superpathway of polyamine biosynthesis II</b> | 3.3E-02 |
| 9    |                                      |         | <b>glycosylglyceride biosynthesis</b>               | 2.8E-02 | <b>spermidine biosynthesis</b>                   | 3.3E-02 |
| 10   |                                      |         |                                                     |         | <b>triacylglycerol degradation</b>               | 3.3E-02 |

**Supplemental Table 6. Sequences of primers used in real-time RT-PCR and PCR.**

*PAL*-phenylalanine ammonia lyase, *CHS*-chalcone synthase, *CHI*-chalcone isomerase, *F3H*-flavanone-3-hydroxylase, *F3'H*-flavonoid-3'-hydroxylase, *F3'5'H*-flavonoid-3'5'-hydroxylase, *FLS*-flavonol synthase, *DFR*-dihydroflavonol reductase, *ANS*-anthocyanidin synthase, *3-GT*-flavonol-3-glucosyltransferase, *RT*-flavonol-3-glucoside. *DXS*-1-deoxy-D-xylulose-5-pyrophosphate synthase, 2. *GGPPS*-1-geranylgeranyl pyrophosphate synthase-1, 3. *GGPPS*-2- geranylgeranyl pyrophosphate synthase-2, 4. *PSY*-1- phytoene synthase-1, 5. *PSY*-2- phytoene synthase-2, 6. *PDS*-phytoene desaturase, 7. *ZDS*- $\zeta$ -carotene desaturase, 8. *CRTISO*-carotene isomerase, 9. *CYC-B*- $\beta$ -lycopene cyclase, 10. *LCY-B*- $\beta$ -lycopene cyclase, 11. *LCY-E*- $\epsilon$ -lycopene cyclase, 12. *GGPPR*-geranylgeranyl pyrophosphate reductase, 13. *GMTT*-g-methyl tocopherol transferase, *rbcL*-large subunit of rubisco.

| Gene ID       | Accession numbers or Reference | Primer sequences            |                          |
|---------------|--------------------------------|-----------------------------|--------------------------|
|               |                                | Forward                     | Reverse                  |
| <i>PAL</i>    | M83314                         | ATTGGGAAATGGCTGCTGATT       | TCAACATTTGCAATGGATGCA    |
| <i>CHS</i>    | X55194                         | TGGTCACCGTGGAGGAGTATC       | GATCGTAGCTGGACCCCTCTGC   |
| <i>CHI</i>    | TC198728                       | GTTTTTCACAAACCAACAGTTCTGAT  | GAAGCAGTGCTCGATTCCATAAT  |
| <i>F3H</i>    | TC171483                       | CACACCGATCCAGGAACCAAT       | GCCCACCAACTTGGTCTTGTA    |
| <i>F3'H</i>   | TC175149                       | GCACCACGAATGCACTTGC         | CGTTAGTACCGTCGGCGAAT     |
| <i>F3'5'H</i> | Luo et al., 2008               | GGCAATTGGACGAGATCCTG        | AAGGAACCTCTCGGGAGTGAA    |
| <i>FLS</i>    | TC172800                       | GAGCATGAAGTTGGGCCAAT        | TGGTGGGTTGGCCTCATTAA     |
| <i>DFR</i>    | Luo et al., 2008               | TCCGAAGACGACAACGGTTT        | TGACAAGCCAAGAGCCGATAA    |
| <i>ANS</i>    | Luo et al., 2008               | GAACTAGCACTTGGCGTCGAA       | TTGCAAGCCAGGCACCATA      |
| <i>3-GT</i>   | TC1766549                      | CGAACGACGAAACACTGTTGA       | TGCAGCATAGATGGCATTGG     |
| <i>RT</i>     | TC1952951                      | CTGGCAATGCAAACAGAGTGA       | TGCACTTGCGGAAGAGTGAGA    |
| <i>rbcL</i>   | AF479571                       | CTGCAGGTACATGCGAAGAA        | TTGCTAATACCCGGAAGTGG     |
| <i>DXS</i>    | AF143812                       | GCGGAGCTATTTACATGGT         | CTGCTGAGCATCCCAAT        |
| <i>GGPP-1</i> | DQ267902                       | GACAGCATCTGAGTCCGTCA        | CTTGCCAGGACAGAGTAGC      |
| <i>GGPP-2</i> | SGN-U223568                    | GGGATTGAAAAGGCTAAGG         | AGCAATCAATGGAGCAGCTT     |
| <i>PSY-1</i>  | Y00521                         | TGGCCCAAACGCATCATATA        | CACCATCGAGCATGTCAAATG    |
| <i>PSY-2</i>  | L23424                         | GTTGATGGCCCTAATGCATCA       | TCAAGCATATCAAATGGCCG     |
| <i>PDS</i>    | X59948                         | GTGCATTTTGATCATCGCATTGAAC   | GCAAAGTCTCTCAGGATTACC    |
| <i>PDSG</i>   | X78271                         | CTAGGTTCTTGCTGCCTTGC        | CCAACTTTTTGGCAATGCTT     |
| <i>ZDS</i>    | AF195507                       | TTGGAGCGTTCGAGGCAA T        | AGAAATCTGCATCTGGCGTATAGA |
| <i>CRTISO</i> | AF416727                       | TTTTGGCGGAATCAACTACC        | GAAAGCTTCACTCCCACAGC     |
| <i>LCY-B</i>  | AF254793                       | TCGTTGGAATCGGTGGTACAG       | AGCTAGTGT CCTTGCCACCAT   |
| <i>CYC-B</i>  | Y18297                         | TGTTATTGAGGAAGAGAAATGTGTGAT | TCCCACCAATAGCCATAACATTTT |
| <i>LCY-E</i>  | Y14387                         | AACACTTGCATTTGGTGCTG        | AGTACAGAGGCGCATTTTGG     |
| Actin         | BT013524                       | AGGTATTGTGTTGGACTCTGGTGAT   | ACGGAGAATGGCATGTGGAA     |
| GGPPR         | SGN-U564570                    | AGACTGAGAGCCCATTCCAA        | CATCCCCAACTAATGCGACT     |
| GMTT          | SGN-U584511                    | GCAATTCGACTTGGTTTGGT        | AAGGATGATTGTGCGTCC       |
